1 **Switching between bacteriostatic and bactericidal antimicrobials for retreatment of bovine**  
2 **respiratory disease (BRD) relapses is associated with an increased frequency of resistant**  
3 **pathogen isolation from veterinary diagnostic laboratory submissions**

4

5 Johann F. Coetzee<sup>1,3\*</sup>, Drew R. Magstadt<sup>1</sup>, Lendie Follett<sup>2</sup>, Pritam K. Sidhu<sup>3</sup>, Adlai M. Schuler<sup>1</sup>,  
6 Adam C. Krull<sup>1</sup>, Vickie L. Cooper<sup>1</sup>, Terry J. Engelken<sup>1</sup>, Annette M. O'Connor<sup>1</sup>

7

8 <sup>1</sup>Department of Veterinary Diagnostic and Production Animal Medicine, College of Veterinary  
9 Medicine, Iowa State University, Ames, IA, 50011

10 <sup>2</sup>Department of Information Management and Business Analytics, College of Business and  
11 Public Administration, Drake University, Des Moines, IA, 50311

12 <sup>3</sup>Department of Anatomy and Physiology, College of Veterinary Medicine, Kansas State  
13 University, Manhattan, KS, 66506.

14

15

16 \*Corresponding Author

17 Email: [jcoetzee@vet.k-state.edu](mailto:jcoetzee@vet.k-state.edu)

18

19 Short title: Antimicrobial drug class selection and resistance in bovine respiratory disease  
20 retreatment

21

## 22 **Abstract**

23           Although 90% of BRD relapses are reported to receive retreatment with a different  
24 class of antimicrobial, studies examining the impact of antimicrobial selection (i.e. bactericidal  
25 or bacteriostatic) on retreatment outcomes and the emergence of antimicrobial resistance (AMR)  
26 are deficient in the published literature. A survey was conducted to determine the association  
27 between antimicrobial class selection for retreatment of BRD relapses on antimicrobial  
28 susceptibility of *Mannheimia haemolytica*, *Pasteurella multocida*, and *Histophilus somni*.  
29 Pathogens were isolated from samples submitted to the Iowa State University Veterinary  
30 Diagnostic Laboratory from January 2013 to December 2015. A total of 781 isolates with  
31 corresponding animal case histories, including treatment protocols, were included in the analysis.  
32 Original susceptibility testing of these isolates for ceftiofur, danofloxacin, enrofloxacin,  
33 florfenicol, oxytetracycline, spectinomycin, tilmicosin, and tulathromycin was performed using  
34 Clinical and Laboratory Standards Institute guidelines. Data were analyzed using a Bayesian  
35 approach to evaluate whether retreatment with antimicrobials of different mechanistic classes  
36 (bactericidal or bacteriostatic) increased the probability of resistant BRD pathogen isolation in  
37 calves. The posterior distribution we calculated suggests that an increased number of treatments  
38 is associated with a greater probability of isolates resistant to at least one antimicrobial. In  
39 addition, the frequency of resistant *M. haemolytica* isolates was greater with retreatment using  
40 antimicrobials of different mechanistic classes than retreatment with the same class. Specifically,  
41 treatment protocols using a bacteriostatic drug first followed by retreatment with a bactericidal  
42 drug was associated with a higher frequency of resistant BRD pathogen isolation. This effect was  
43 more profound with specific treatment combinations; tulathromycin (bacteriostatic) followed by  
44 ceftiofur (bactericidal) was associated with the highest probability of resistant isolates among all

45 antimicrobial combinations. These findings suggest that the selection of antimicrobial  
46 mechanistic class for retreatment of BRD should be considered as part of an antimicrobial  
47 stewardship program.

48

49 **Key Words:** antimicrobials; bacteriostatic; bactericidal; bovine respiratory disease; *Histophilus*  
50 *somni*; *Mannheimia haemolytica*; *Pasteurella multocida*; resistance.

51

## 52 **Introduction**

53           Bovine respiratory disease (BRD) is one of the most important diseases facing the beef  
54 cattle industry [1]. Annual economic losses due to BRD are estimated to approach \$1 billion in  
55 the United States alone [1,2]. Treatment and control of BRD are currently predicated on  
56 administration of antimicrobial therapy directed toward the primary bacterial pathogens  
57 *Mannheimia haemolytica*, *Pasteurella multocida*, and *Histophilus somni*. Antimicrobial drugs  
58 are broadly classified into two groups, namely those that inhibit growth of the organism (ie.  
59 bacteriostatic) and those that kill the organism (ie, bactericidal). The National Animal Health  
60 Monitoring System Feedlot 2011 study reported that  $21.2 \pm 2.0\%$  (standard error; SE) of cattle in  
61 feedlots were administered antimicrobials to control an expected outbreak of BRD, and  
62 approximately 15% of feedlot cattle required a second antimicrobial treatment for the disease  
63 [3,4,5]. Although approximately 90% of cases with BRD relapse were reported to receive  
64 retreatment with a different antimicrobial mechanistic class [5], studies examining the impact of  
65 antimicrobial drug class on retreatment outcomes and the emergence of antimicrobial resistance  
66 (AMR) are scarce in the published literature. Knowledge of the impact of antimicrobial drug  
67 selection on AMR emergence is needed to develop judicious use guidelines that preserve  
68 antimicrobial efficacy and advance antimicrobial stewardship.

69           Minimum inhibitory concentration (MIC) data obtained from samples submitted to  
70 veterinary diagnostic laboratories (VDLs) reflect antimicrobial susceptibility and are commonly  
71 used to describe AMR changes in livestock populations [6,7,8]. A retrospective study of *M.*  
72 *haemolytica*, recovered from lung samples submitted to the Kansas State University VDL  
73 between 2009 and 2011, reported a 7-fold increase in the number of isolates resistant to five or  
74 more antimicrobials over a 3-year period [9]. However, the association between antimicrobial

75 treatment and the recovery of a resistant *M. haemolytica* isolate could not be evaluated because  
76 individual animal treatment histories were not reported. Recently, our group reported an  
77 association between treatment history and antimicrobial sensitivity results from bacterial isolates  
78 obtained from BRD cases submitted to the Iowa State University VDL (ISU-VDL) from 2013–  
79 2015 [10]. Bacterial isolates from cattle that received antimicrobial treatment showed a higher  
80 incidence of antimicrobial resistance than isolates from untreated cattle. Furthermore, the  
81 percentage of resistant isolates increased with the number of antimicrobial treatments. However,  
82 the relationships between the antimicrobial drug class selected for initial treatment and  
83 retreatment as well as the frequency of AMR pathogen isolation were not investigated.

84         It was revealed more than 50 years ago that an overall reduction in antimicrobial efficacy  
85 occurs when antimicrobials that cause target organism death (i.e., bactericidal agents) are used in  
86 combination with antimicrobials that only inhibit bacterial replication (i.e., bacteriostatic agents)  
87 [11,12]. The resulting drug antagonism is associated with poorer clinical outcomes [12-14].  
88 These findings suggest that the choice of antimicrobial drug class (i.e., bactericidal or  
89 bacteriostatic) in cases of relapse and retreatment may be a critical control point for mitigating  
90 AMR in beef production systems. The objectives of this study were to use a Bayesian approach  
91 to 1) obtain the posterior distribution of the resistance patterns for the number of treatments (1, 2,  
92 3, or 4+) administered to cases submitted to the ISU-VDL, and 2) test the hypothesis that  
93 antimicrobial resistant BRD pathogens are recovered more frequently from calves that received  
94 second-line treatment from a different antimicrobial class than from calves that received second-  
95 line treatment from the same antimicrobial class.

## 96 **Materials and Methods**

### 97 **Study design**

98 This cross-sectional study used data collected from the electronic and paper laboratory  
99 records of the ISU-VDL from January 1, 2013 to December 2, 2015, including the original  
100 documents, which were used to extract the relevant antimicrobial treatment information. The  
101 data were retrieved in 2016.

### 102 **Settings**

103 The 1,251 isolates available for analysis were submitted to the ISU-VDL by referring  
104 veterinarians from 24 states. The majority of isolates were from Iowa (778), Minnesota (80), and  
105 South Dakota (49). Most isolates were obtained from animals housed in feedlots (498),  
106 confinement operations (268), or pastures (162). The demographic information from the sample  
107 submissions is summarized in Tables S1 and S2.

### 108 **Cases and case isolates**

109 Bacterial isolate data and the corresponding case history information were included in the  
110 study upon meeting the following criteria: 1) The submitted samples were from a bovine field  
111 case (research cases were excluded); 2) *M. haemolytica*, *P. multocida*, or *H. somni* were isolated  
112 via routine culture; 3) The sample that yielded the isolate was from the lower respiratory tract  
113 (lung, pleural surface, bronchoalveolar lavage fluid); 4) MIC testing results were available; 5)  
114 The submission form stated a history of respiratory disease and/or evidence of pneumonia was  
115 described in autopsy findings or upon histological evaluation of lung tissue; and 6) The  
116 submitting veterinarian provided a treatment history that included either the generic or trade  
117 name of the antimicrobials used in the treatment of the case prior to sample submission.

118 **Study size**

119 No *a priori* sample size was determined because the study was intended to be cross-  
120 sectional and hypothesis-generating. Therefore, sample size was determined solely by the  
121 number of eligible isolates available during the study period.

122 **Variables and data sources**

123 The outcome of interest was the Clinical and Laboratory Standards Institute (CLSI)-  
124 validated interpretive category based on MIC.

125 Susceptibility testing was performed according to standard laboratory methods based on  
126 CLSI recommendations [15]. Briefly, the selected culture was grown overnight and a broth  
127 dilution was inoculated on a standard 96-well susceptibility plate (BOPO6F, Thermo Scientific,  
128 Oakwood Village, OH, USA) using an automated inoculation system (Sensititre AIM, Thermo  
129 Scientific). Susceptibility plates were read using a manual system (Sensititre Vizion System,  
130 Thermo Scientific) following 18–24 h incubation at 37°C.

131 Not all antimicrobial compounds included on the standard susceptibility plate have CLSI-  
132 validated interpretive breakpoints; therefore, only antimicrobials with CLSI-approved  
133 breakpoints [2] for respiratory disease caused by *M. haemolytica* were included in this study (S3  
134 Table). The antimicrobials included in this study were ceftiofur, danofloxacin, enrofloxacin,  
135 florfenicol, oxytetracycline, spectinomycin, tilmicosin, and tulathromycin. Established CLSI-  
136 validated breakpoints are not available for tilmicosin against *P. multocida* or tilmicosin and  
137 danofloxacin against *H. somni* in BRD; therefore, these antimicrobials were included in this  
138 study using the CLSI-validated breakpoints for *M. haemolytica*.

139 Treatment history was recorded in the paper submission forms by the referring  
140 veterinarian. Information regarding the number of antimicrobial treatments, specific

141 antimicrobials used, and non-antimicrobial treatments was manually extracted from these records  
142 by one investigator (AS). Isolates from submissions that explicitly stated no usage of  
143 antimicrobial drugs were assigned the treatment history classification of none (“0”). Isolates  
144 from cases in which information regarding antimicrobial treatments was unclear (e.g., “many” or  
145 “everything”) or not given were classified as “unknown.” Isolates from cases with treatment  
146 histories indicating the use of four or more antimicrobials were classified as “4+.”

147 Trade names were converted to generic drug names to determine the antimicrobial drug  
148 class (bacteriostatic or bactericidal) and the sequence of class administration for first- and  
149 second-line treatments. Drug class was assigned based on the established *in vitro*  
150 pharmacodynamics of the antimicrobial agent as summarized in **Table 1**.

151 **Table 1. Classification of antimicrobial drugs on the basis of antimicrobial activity.**

| <b>Bactericidal</b> | <b>Bacteriostatic</b> |
|---------------------|-----------------------|
| Ceftiofur           | Chlortetracycline     |
| Danofloxacin        | Florfenicol           |
| Enrofloxacin        | Gamithromycin         |
| Penicillin          | Oxytetracycline       |
|                     | Spectinomycin         |
|                     | Sulfadimethoxine      |
|                     | Tildipirosin          |
|                     | Tilmicosin            |
|                     | Tulathromycin         |
|                     | Tylosin               |

152



153 Data on potential confounders or effect modifiers extracted from the submission form,  
154 including breed, sex, facility type, clinical signs, necropsy findings, vaccination status, and  
155 weights, were recorded (**Tables S1 and S2**). Finalized case report information, such as  
156 microscopic evidence of pneumonia, also was noted. Case information was classified as  
157 “unknown” if the information was not supplied or unclear. After each eligible record was  
158 identified, the submission forms for each case were individually reviewed by a single researcher  
159 (AS). Antimicrobial treatments were grouped as -cidal or -static based on antimicrobial activity  
160 level.

### 161 **Variable transformations**

162 Due to sparse data for cases receiving multiple treatments, we arbitrarily chose to group  
163 together animals that received more than three treatments (4+). Animals with unknown treatment  
164 histories were excluded from the analysis.

165 For the subset of animals receiving just two treatments, we created two categorical  
166 variables. One categorical variable grouped the data into two levels: “same” to designate animals  
167 that received first- and second-line treatment from the same drug class (i.e., either bacteriostatic  
168 and bacteriostatic or bactericidal and bactericidal) and “different” to designate animals that  
169 received first- and second-line treatment from different drug classes (i.e., either bacteriostatic  
170 followed by bactericidal or bactericidal followed by bacteriostatic). We also created a four-level  
171 categorical variable to capture all possible combinations (4 levels: bacteriostatic followed by  
172 bactericidal, bacteriostatic followed by bacteriostatic, bactericidal followed by bacteriostatic, and  
173 bactericidal followed by bactericidal).

## 174 Statistical analysis

175 Initial analysis included descriptive statistics to illustrate the distribution of the number of  
176 treatments cross tabulated with the number of antimicrobials of which the isolate was classified  
177 as resistant. The number of missing values also was determined. We created heat maps to show  
178 the pairwise interactions of antimicrobial treatment combinations associated with the  
179 development of resistant *M. haemolytica* mutants.

180 The approach for addressing our two objectives was to conduct a Bayesian analysis using  
181 a finite mixture model based on a zero-inflated beta-binomial model. The open source software  
182 R was used to conduct this analysis. For both objectives, we let  $y_{ij}$  represent the number of  
183 resistant organisms, where  $i$  represents the level of the explanatory variable treatment and  $j$   
184 represents the organism. We assume the observations are conditionally independent. We write  
185 the model as follows:

$$186 \quad (y_{ij} | \gamma_i, z_{ij} = 1) \sim \text{Binomial}(18, \gamma_i)$$

$$187 \quad (P(y_{ij} = 0 | \gamma_i, z_{ij} = 0) = 1.$$

188 where  $z_{ij}$  represents the category (i.e., antimicrobial drug class) and  $n = 18$  represents the  
189 number of possible antimicrobials. Thus, the probability density function of  $y_{ij}$  is:

$$190 \quad \binom{18}{y_{ij}} \gamma_i^{y_{ij}} (1 - \gamma_i)^{18 - y_{ij}} (I(y_{ij} = 0))^{1 - z_{ij}}.$$

191 We allow the category indicator,  $z_{ij}$ , to also be conditionally independent with the following  
192 distributional assumption:

$$193 \quad z_{ij} | p_i \sim \text{Bernoulli}(p_i)$$

194  
195 *Rho* ( $p_i$ ) and *gamma* ( $\gamma_i$ ) are assumed to be independent with priors specified as followed:

$$196 \quad \gamma_i \sim \text{Beta}(a, b)$$

197  $p_i \sim \text{Beta}(a, b)$

198 where  $a = 1$  and  $b = 1$ .

199 For Objective 1,  $i$  in the model referred to the number of treatments reported by the  
200 submitter (i.e.,  $i$  had five levels: 0, 1, 2, 3, and 4+ treatments). For Objective 2, two models were  
201 created for the subset of animals that received two treatments. For the first model (Objective 2  
202 Model 1),  $\gamma_i$  referred to the two-level sequence of treatments reported by the submitter (i.e.,  $i$  had  
203 two levels: same and different). For the second model (Objective 2 Model 2),  $\gamma_i$  referred to the  
204 four-level sequence of treatments reported by the submitter (i.e.,  $i$  had four levels: bactericidal-  
205 bactericidal, bactericidal-bacteriostatic, bacteriostatic-bactericidal, and bacteriostatic-  
206 bacteriostatic). We sampled from the joint posterior distribution of  $\gamma_i$  and  $\rho_i$  implied by the model  
207 using a Metropolis random walk Markov chain Monte Carlo (MCMC) approach.

208 One output from each model was the posterior distribution of  $\rho_i$  based on each  $i^{\text{th}}$  level of  
209 the explanatory variable; i.e.,  $\rho_i$  is the probability that an animal in group  $i$  comes from the  
210 binomial distribution. We use this posterior distribution to make inferences about the data. For  
211 example, we are interested in the probability that an organism is resistant to at least one  
212 antimicrobial, which is given by  $\rho_i^*$  (probability binomial [18,  $\gamma_i$ ] random variable  $> 0$ ). We are  
213 also interested in whether this probability is associated with either the number of times an animal  
214 is treated or the treatment sequence. The other output was the posterior distribution of  $\gamma_i$  based on  
215 each  $i^{\text{th}}$  level of the explanatory variable. Posterior  $\gamma$  distributions that are shifted to the right  
216 indicate an isolate that is resistant to a higher number of antimicrobials.

217 To “test” the relationship between the probability of at least one resistant test result and  
218 the number of treatments, we determined the posterior distribution of  $p_{i+1} > p_i$ , i.e., how often the

219 probability of having at least one resistant test was higher for  $i + I$  treatments compared to  $i$   
220 treatments.

221 After creating the models, we assessed several discrepancy measures, including the  
222 number of zeros in the posterior distribution of  $y^*$  and the number of extreme values. This first  
223 reflects the inflation of zeros in the observed distribution and is mainly informed by the posterior  
224 distribution of  $\rho_i$ . The second measure assesses the distribution of resistant organisms, given that  
225 they are resistant, and is mainly informed by the posterior distribution of  $\gamma_i$ . For each posterior  
226 distribution of  $\gamma_i$  and  $\rho_i$ , we reported the 95% credible interval (95% CI) and also the posterior  
227 probability that  $\gamma_i < \gamma_{\neq i}$  and  $\rho_i < \rho_{\neq i}$  for all possible pairwise comparisons.

## 228 **Ancillary analyses and sensitivity analyses**

229 We originally intended to conduct further subgroup analysis based on the particular  
230 isolates of *M. haemolytica*, *P. multocida*, and *H. somni*. However, on further examination, we  
231 determined that the data were too sparse to warrant further subgrouping. We also were originally  
232 interested in the impact of two covariates, simultaneous viral and *Mycoplasma* spp. infection, on  
233 the posterior distribution; however, descriptive analysis indicated that this approach was unlikely  
234 to be useful. Thus, although we extracted these data, we did not conduct these analyses.

## 235 **Results and Discussion**

236 In North America, BRD in feedlot cattle results in substantial economic losses due to the  
237 costs of treatment and deleterious effects on animal health and production [14,16]. Although  
238 BRD has a complex, multifactorial etiology, *M. haemolytica*, *P. multocida*, and *H. somni* are  
239 most often associated with clinical disease [17,18]. Therefore, use of antimicrobials is essential  
240 for the control and treatment of BRD in cattle. Commonly used antimicrobial agents that are

241 approved in the US for treatment of BRD include ceftiofur, tilmicosin, tulathromycin,  
 242 florfenicol, enrofloxacin, and danofloxacin.

243 An increasing number of reports regarding decreased efficacy of these antimicrobial agents for  
 244 treatment of BRD have been published in recent years [9,19,20,21]. Typically, cattle affected  
 245 with BRD are treated with a drug of a different antimicrobial class than the drug given for first  
 246 treatment or disease prevention (metaphylaxis). When an animal does not respond to the first-  
 247 line treatment, it may be treated with one or more additional classes of antimicrobial drugs over  
 248 subsequent days. Data analyzed in the present study confirm the use of multiple classes of  
 249 antimicrobial treatments used to treat BRD (**Table 2**), which is similar to the findings of an  
 250 earlier report [10]. However, despite the frequent use of sequential treatments, there are no data  
 251 indicating what drug classes, doses, or scheduling criteria might be optimal when using  
 252 sequential treatments for BRD in cattle.

253 **Table 2. Summary of bacterial isolates obtained from submitted samples of animals treated**  
 254 **with bacteriostatic/bactericidal antimicrobial agents.**

| <b>Year</b>                                            | <b>2013</b> |           |           | <b>2014</b> |           |           | <b>2015</b> |           |           | <b>Total</b> |
|--------------------------------------------------------|-------------|-----------|-----------|-------------|-----------|-----------|-------------|-----------|-----------|--------------|
| <b>Organisms (culture)</b>                             | <b>MH</b>   | <b>PM</b> | <b>HS</b> | <b>MH</b>   | <b>PM</b> | <b>HS</b> | <b>MH</b>   | <b>PM</b> | <b>HS</b> |              |
| Isolates from submissions with treatment history       | 113         | 56        | 52        | 127         | 90        | 81        | 106         | 94        | 62        | <b>781</b>   |
| <b>Total isolates/year</b>                             | <b>221</b>  |           |           | <b>298</b>  |           |           | <b>262</b>  |           |           |              |
| <b>Isolates from non-treated cases</b>                 | 28          | 19        | 13        | 27          | 29        | 17        | 25          | 19        | 17        |              |
|                                                        | <b>60</b>   |           |           | <b>73</b>   |           |           | <b>61</b>   |           |           |              |
| <b>Isolates from first-line bactericidal treatment</b> |             |           |           |             |           |           |             |           |           |              |
| Ampicillin                                             | 0           | 0         | 0         | 1           | 0         | 0         | 0           | 2         | 0         | 3            |
| Ceftiofur                                              | 14          | 1         | 5         | 15          | 10        | 11        | 13          | 8         | 4         | 81           |
| Danofloxacin                                           | 0           | 1         | 0         | 1           | 1         | 0         | 0           | 0         | 0         | 3            |
| Enrofloxacin                                           | 12          | 5         | 6         | 10          | 9         | 11        | 13          | 14        | 5         | 85           |
| Penicillin                                             | 2           | 2         | 0         | 0           | 0         | 0         | 2           | 2         | 1         | 9            |

| <b>Total</b>                                             | <b>48</b>  |    |    | <b>69</b>  |    |    | <b>64</b>  |    |    | <b>181</b> |
|----------------------------------------------------------|------------|----|----|------------|----|----|------------|----|----|------------|
| <b>Isolates from first-line bacteriostatic treatment</b> |            |    |    |            |    |    |            |    |    |            |
| Chlortetracycline                                        | 0          | 0  | 0  | 4          | 4  | 1  | 1          | 0  | 1  | 11         |
| Florfenicol                                              | 6          | 6  | 7  | 8          | 7  | 9  | 16         | 8  | 8  | 75         |
| Gamithromycin                                            | 2          | 1  | 0  | 9          | 6  | 2  | 5          | 1  | 2  | 28         |
| Oxytetracycline                                          | 2          | 1  | 1  | 0          | 3  | 1  | 1          | 2  | 1  | 12         |
| Sulfadimethoxine                                         | 2          | 2  | 0  | 0          | 0  | 1  | 1          | 0  | 0  | 6          |
| Tetracycline                                             | 0          | 0  | 0  | 5          | 2  | 2  | 0          | 1  | 2  | 12         |
| Tildipirosin                                             | 11         | 3  | 4  | 6          | 5  | 6  | 4          | 8  | 3  | 50         |
| Tilmicosin                                               | 4          | 4  | 4  | 8          | 1  | 5  | 2          | 2  | 0  | 30         |
| Tulathromycin                                            | 29         | 10 | 11 | 33         | 13 | 15 | 24         | 26 | 18 | 179        |
| Tylosin                                                  | 1          | 1  | 1  | 0          | 0  | 0  | 0          | 0  | 0  | 3          |
| <b>Total</b>                                             | <b>113</b> |    |    | <b>156</b> |    |    | <b>137</b> |    |    | <b>406</b> |

255 (MH = *M. haemolytica*, PM = *P. multocida*, HS = *H. somni*)

256 A total of 1,251 bacterial isolates were available for our analysis, including 540 isolates  
 257 of *M. haemolytica*, 404 isolates of *P. multocida*, and 307 isolates of *H. somni*. Isolates were  
 258 obtained from 1,031 individual animals under 989 case submissions by 378 veterinarians. **Table**  
 259 **2** summarizes the numbers of each organism isolated each year over the course of the study.

260 The full data set of 781 of 1,251 bacterial isolates was used for analysis because 470  
 261 isolates did not have treatment information included with the sample submission. The remaining  
 262 dataset available for Objective 1 included 781 isolates, of which 194 received 0 treatments, 276  
 263 received 1 treatment, 211 received 2 treatments, 74 received 3 treatments, 23 received 4  
 264 treatments, 2 received 5 treatments, and 1 received 7 treatments. Missing data for this subset is  
 265 presented in **Table S1**. Previous laboratory studies also identified multiple drug resistant (MDR)  
 266 isolates from lung tissues collected from fatal BRD cases [9,14,22,23]. Poor response to  
 267 antimicrobial therapy in fatal BRD cases may be associated with the presence of sub-inhibitory  
 268 concentrations of antimicrobial drugs due to pre-treatment, which could induce positive selection  
 269 leading to resistance [24,25]. A total of 211 isolates were from animals that received only two

270 treatments. Of these isolates, 101 were *M. haemolytica*, 50 were *H. somni*, and 60 were *P.*  
271 *multocida*. These isolates were treated with the same drug class in 97 cases (18 bactericidal-  
272 bactericidal and 79 bacteriostatic-bacteriostatic) and 114 were treated with different drug classes  
273 (52 bactericidal-bacteriostatic and 62 bacteriostatic-bactericidal).

274 The observed antimicrobial susceptibility profiles for *M. haemolytica* based on MIC data  
275 of cattle administered either the “same” (first and second treatment were both either bactericidal  
276 drugs, or bacteriostatic drugs) or “different” (first treatment was bactericidal and second was  
277 bacteriostatic or *vice versa*) antimicrobial treatment is presented in **Fig. 1**. A similar examination  
278 of the data was not conducted for *P. multocida* and *H. somni* because there were an insufficient  
279 number of isolates for this to be meaningful.

280 **Fig. 1. Distribution of minimum inhibitory concentrations (MIC) of antimicrobial agents**  
281 **with CLSI approved breakpoints for *M. haemolytica* in cattle receiving the same or**  
282 **different treatments. S = susceptible; I = intermediate; R = resistant. For “same”**  
283 **treatments, the first and second treatment were either bactericidal drugs or bacteriostatic**  
284 **drugs. For “different” treatments, the first treatment was bactericidal and second was**  
285 **bacteriostatic or *vice versa*.**

286 Antimicrobial treatments were grouped based on their anticipated impact on bacterial  
287 growth in vitro, i.e., bactericidal (“cidal”) or bacteriostatic (“static”). We created a heatmap to  
288 illustrate the impact of specific pairs of combinations of first and second antimicrobial treatments  
289 on the number of isolates identified as resistant against the listed antimicrobials with CLSI  
290 breakpoints (**Fig. 2**). Red indicates the observed maximum number of resistant isolates and white  
291 (i.e., blank) represents no observation of antimicrobial resistance for a specific antimicrobial

292 combination (**Fig. 2**). A similar examination of the data was not conducted for *P. multocida* and  
293 *H. somni* because there were an insufficient number of isolates for this to be meaningful.

294 **Fig. 2. Heat maps showing pairwise interactions of antimicrobial treatment combinations**  
295 **associated with the isolation of resistant *M. haemolytica* organisms. The effect of treatment**  
296 **with ceftiofur (CEF), danofloxacin (DANO), enrofloxacin (ENRO), florfenicol (FLOR),**  
297 **gamithromycin (GAM), oxytetracycline (OXY), penicillin (PEN), spectinomycin (SPEC),**  
298 **sulfadimethoxine (SULF), tetracycline (TET), tildipirosin (TILD), tilmicosin (TILM),**  
299 **tulathromycin (TUL), and tylosin (TYL) as either first (X-axis) or second (Y-axis)**  
300 **treatment on the frequency of isolating *M. haemolytica* organisms resistant to danofloxacin**  
301 **(A), enrofloxacin (B), florfenicol (C), spectinomycin (D), tilmicosin (E) and tulathromycin**  
302 **(F) was examined using CLSI interpretive criteria. White indicates no observation of**  
303 **antimicrobial resistance with that specific combination.**

304 Due to the limited number of isolates available from animals that received more than 2  
305 treatments, we did not explore or conduct sensitivity analysis on the impact of other possible  
306 antimicrobial combinations on the isolation of resistant organisms. We also did not explore  
307 alternatives to the priors chosen for the Bayesian analysis, as we considered the chosen priors to  
308 be the most biologically defensible. A variable to account for the non-independence of isolates  
309 from the same animal was not included in the model, as the number of these cases was relatively  
310 small.

311 The distribution of AMR in bacterial isolates demonstrated an association between the  
312 isolation of an AMR bacteria and the number of treatments used (**Fig. 3 and Table 3**). The data  
313 indicate that administration of two or more antimicrobial agents to treat BRD in cattle may  
314 increase the likelihood of isolating an antimicrobial resistant pathogen (**Fig. 3**).



315 **Fig. 3. Observed frequency distribution of antimicrobial resistant isolates based on CLSI**  
 316 **breakpoints for animals receiving antimicrobials for BRD. 0 = no treatment, 1 = 1**  
 317 **treatment, 2 = 2 treatments, 3 = 3 treatments, 4 = 4 or more treatments, and NA = missing**  
 318 **information.**

319 **Table 3. 95% credible intervals (95% CIs) for the posterior distributions representing the**  
 320 **probability of having at least one resistance result to at least one of the assessed**  
 321 **antimicrobials (i.e.,  $\rho$ ) based on CLSI breakpoints stratified by the number of**  
 322 **antimicrobials the animal received.**

| Objective, Model                                                         | Percentile |      |       |
|--------------------------------------------------------------------------|------------|------|-------|
|                                                                          | 2.5%       | 50%  | 97.5% |
| Objective 1 Model 1: treatment frequency (n = 781)                       |            |      |       |
| 0 treatments                                                             | 0.29       | 0.36 | 0.55  |
| 1 treatment                                                              | 0.49       | 0.55 | 0.61  |
| 2 treatments                                                             | 0.63       | 0.69 | 0.76  |
| 3 treatments                                                             | 0.69       | 0.80 | 0.88  |
| 4+ treatments                                                            | 0.61       | 0.78 | 0.90  |
| Two treatment sequences (n = 211)                                        |            |      |       |
| Same (bactericidal + bactericidal, bacteriostatic + bacteriostatic)      | 0.61       | 0.71 | 0.79  |
| Different (bacteriostatic + bactericidal, bactericidal + bacteriostatic) | 0.59       | 0.69 | 0.76  |
| Four treatment sequences (n = 211)                                       |            |      |       |
| Bactericidal + bactericidal                                              | 0.54       | 0.77 | 0.92  |
| Bactericidal + bacteriostatic                                            | 0.51       | 0.64 | 0.76  |
| Bacteriostatic + bacteriostatic                                          | 0.59       | 0.69 | 0.79  |

|                               |      |      |      |
|-------------------------------|------|------|------|
| Bacteriostatic + bactericidal | 0.60 | 0.72 | 0.82 |
|-------------------------------|------|------|------|

323 For Objective 1, the posterior distribution for  $\rho$  (i.e., the probability of being  
 324 resistant to at least one antimicrobial) is provided in **Error! Reference source not found.**The  
 325 95% CI for the  $\rho$  distribution is provided in **Error! Reference source not found.** 3. Based on  
 326 the interpretation of the posterior distributions, the use of antimicrobials was associated with an  
 327 increased probability of having at least one resistant outcome because the median and 95% CIs  
 328 shift to the right toward higher probabilities as the number of antimicrobial treatments increased.  
 329 In addition, there was evidence of an exposure response (i.e., increasing the number of  
 330 treatments increases the probability of at least one resistant test). The evidence for a response to  
 331 increasing antimicrobial exposure can be found in **Error! Reference source not found.** 4.

332 **Table 4. Posterior probability that the posterior distribution of  $p_{i+1} > p_i$ .**

| Objective 1   | 0 treatments | 1 treatment | 2 treatments | 3 treatments | 4+ treatments |
|---------------|--------------|-------------|--------------|--------------|---------------|
| Model 1       |              |             |              |              |               |
| 0 treatments  | NA           | 0.99        | 1            | 1            | 1             |
| 1 treatment   | -            | NA          | 0.99         | 1            | 0.99          |
| 2 treatments  | -            |             | NA           | 0.95         | 0.82          |
| 3 treatments  | -            | -           |              | NA           | 0.40          |
| 4+ treatments | -            | -           | -            |              | NA            |

333  $i$  represents the number of treatment approaches that differ based on Objective 1 Model 1.

334  
 335 As reported in **Table 4**,  $\rho$  increased as the number of reported treatments increased. For example,  
 336 40%, 82%, 99%, and 100% of the time,  $\rho$  was higher if animals received more than 4 treatments  
 337 when compared to  $\rho$  for 3 treatments, 2 treatments, 1 treatment, or 0 treatments, respectively.

338 When  $\rho$  values were entered into the Bernoulli distribution, they translated into a higher  
 339 prevalence of isolates with at least one resistant outcome.

340 The posterior distributions of  $\gamma$  (where  $\gamma_i$  = number of resistant tests each isolate has) are  
 341 shown in **Error! Reference source not found. 5** (95% CI in **Table 5**).

342 **Fig. 5. Posterior distributions of the probability that the isolate is resistant to multiple**  
 343 **antimicrobials (i.e.,  $\gamma_i$ ) stratified by treatment frequency. 0 = no treatment, 1 = 1 treatment,**  
 344 **2 = 2 treatments, 3 = 3 treatments, and 4+ = 4 or more treatments.**

345 **Table 5. Credibility percentiles for posterior distributions for the number of resistant test**  
 346 **results from an isolate ( $\gamma_i$ ).**

|                                                                          | Percentile |      |       |
|--------------------------------------------------------------------------|------------|------|-------|
|                                                                          | 2.5%       | 50%  | 97.5% |
| Objective 1 Model 1: Treatment frequency                                 | 2.5%       | 50%  | 97.5% |
| 0 treatments                                                             | 0.09       | 0.11 | 0.13  |
| 1 treatment                                                              | 0.17       | 0.19 | 0.21  |
| 2 treatments                                                             | 0.21       | 0.23 | 0.25  |
| 3 treatments                                                             | 0.23       | 0.26 | 0.28  |
| 4+ treatments                                                            | 0.21       | 0.25 | 0.30  |
| Objective 2 Model 1: 2-treatment sequences                               |            |      |       |
| Same (bactericidal + bactericidal, bacteriostatic + bacteriostatic)      | 0.18       | 0.20 | 0.23  |
| Different (bacteriostatic + bactericidal, bactericidal + bacteriostatic) | 0.23       | 0.25 | 0.28  |
| Objective 2 Model 2: 4-treatment sequences                               |            |      |       |

|                                  |      |      |      |
|----------------------------------|------|------|------|
| Bactericidal + bactericidal,     | 0.18 | 0.23 | 0.29 |
| Bactericidal + bacteriostatic,   | 0.17 | 0.21 | 0.24 |
| Bacteriostatic + bacteriostatic, | 0.17 | 0.19 | 0.22 |
| Bacteriostatic + bactericidal    | 0.26 | 0.28 | 0.32 |

347

348 Consistent with the results for  $\rho$ , there was evidence that increased exposure to  
 349 antimicrobials resulted in a higher probability of an isolate being resistant to more than one  
 350 antimicrobial (**Error! Reference source not found. 6**). However, for the difference between 3  
 351 treatments and 4+ treatments, there was only 49% probability (50/50) of one being higher than  
 352 the other, suggesting a possible threshold or an imprecise estimate of the  $\gamma_i$  posterior distribution.

353 **Table 6. Posterior probability that  $\gamma_{i+1}$  is greater than  $\gamma_i$  where  $i$  is the number of treatment**  
 354 **approaches which differ based on objective 1 model 1 and  $\gamma_i$  = number of resistant tests for**  
 355 **an isolate.**

| Objective 1 Model 1: Posterior distribution based on treatment frequency |              |              |              |              |               |
|--------------------------------------------------------------------------|--------------|--------------|--------------|--------------|---------------|
| $i$                                                                      | 0 treatments | 1 treatments | 2 treatments | 3 treatments | 4+ treatments |
| 0 treatments                                                             | NA           | 1            | 1            | 1            | 1             |
| 1 treatment                                                              | -            | NA           | 0.99         | 1            | 0.99          |
| 2 treatments                                                             | -            |              | NA           | 0.95         | 0.87          |
| 3 treatments                                                             | -            | -            |              | NA           | 0.49          |
| 4+ treatments                                                            | -            | -            | -            |              | NA            |

356  $i$  is the number of treatments administered based on Objective 1 Model 1.

357 Objective 2 examined the development of resistance based on whether the antimicrobial  
 358 selected for the initial treatment and retreatment would be expected to kill the bacteria in-vitro

359 (i.e. bactericidal) or inhibit the replication of the bacteria in-vitro (i.e. bacteriostatic). As shown  
360 in **Error! Reference source not found.. 6** and **Error! Reference source not found. 3**, the  
361 posterior distribution of  $\rho$  (i.e., the probability of the isolate being resistant to at least one  
362 antimicrobial) when animals received drugs of the same or different mechanistic classes does not  
363 appear to be associated with different distributions.

364 **Fig. 6. Posterior distribution of the probability that the isolate is resistant to at least one**  
365 **antimicrobial (i.e.,  $\rho_i$ ) stratified by the expected in-vitro activity (i.e. bactericidal or**  
366 **bacteriostatic) of first and second treatment. Same = same in-vitro effect on bacterial**  
367 **growth, i.e., bactericidal followed by bactericidal or bacteriostatic followed by**  
368 **bacteriostatic; or different = different in-vitro effect on bacterial growth, i.e., bactericidal**  
369 **followed by bacteriostatic or bacteriostatic followed by bactericidal.**

370 However, when examining the posterior distribution of  $\gamma$  (where  $\gamma_i$  = number of resistant  
371 tests for an isolate), the posterior probability of  $\gamma_{\text{different}} > \gamma_{\text{same}}$  was 99% (**Error! Reference**  
372 **source not found.. 7** and **Error! Reference source not found. 5**).

373 **Fig. 7. Posterior distributions of the probability that the isolate is resistant to multiple**  
374 **antimicrobials (i.e.,  $\gamma_i$ ) stratified by the expected in-vitro activity (i.e. bactericidal or**  
375 **bacteriostatic) of first and second treatment. Same = same in-vitro effect on bacterial**  
376 **growth, i.e., bactericidal followed by bactericidal or bacteriostatic followed by**  
377 **bacteriostatic or different = different in-vitro effect on bacterial growth, i.e., bactericidal**  
378 **followed by bacteriostatic or bacteriostatic followed by bactericidal.**

379 The results of the analysis from Objective 2 Model 1 suggest that the sequential  
380 administration of antimicrobial treatments with different effects on bacterial growth may be  
381 associated with higher numbers of resistant isolates and elevated MIC outcomes. Objective 2

382 Model 2 explores whether the sequence of bactericidal and bacteriostatic treatments has an  
 383 impact on the probability of recovering a resistant BRD isolate. This analysis suggests that there  
 384 is little impact of the treatment scheme sequence on the probability of identifying an isolate that  
 385 is resistant to at least one antimicrobial ( $\rho$ ). The specific posterior distributions and the 95% CI  
 386 of  $\rho$  are shown in **Error! Reference source not found.. 8** and **Error! Reference source not**  
 387 **found. 3**. Similarly, the posterior probability of an organism being resistant to at least one  
 388 antimicrobial is presented in **Table 7**.

389 **Fig. 8. Posterior distribution of the probability that the isolate is resistant to at least one**  
 390 **antimicrobial (i.e.,  $\rho_i$ ) stratified by the expected in-vitro activity (i.e. bactericidal or**  
 391 **bacteriostatic) of first and second treatment.** Cidal-Cidal = bactericidal first treatment  
 392 followed by bactericidal retreatment, Cidal-Static = bactericidal first treatment followed by  
 393 bacteriostatic retreatment, Static-Static = bacteriostatic first treatment followed by bacteriostatic  
 394 retreatment and Static-Cidal = bacteriostatic first treatment followed by bactericidal retreatment.

395 **Table 7. Posterior probability that  $p_{i+1}$  is greater than  $p_i$  ( $i$  -4-level treatment mechanism**  
 396 **sequence for objective 2 model 2).**

|                                 | Bactericidal +<br>bactericidal | Bactericidal +<br>bacteriostatic | Bacteriostatic<br>+ bacteriostatic | Bacteriostatic<br>+ bactericidal |
|---------------------------------|--------------------------------|----------------------------------|------------------------------------|----------------------------------|
| Bactericidal + bactericidal     | NA                             | 0.16                             | 0.28                               | 0.35                             |
| Bactericidal + bacteriostatic   | --                             | NA                               | 0.73                               | 0.81                             |
| Bacteriostatic + bacteriostatic | -                              | -                                | NA                                 | 0.62                             |
| Bacteriostatic + bactericidal   | -                              | -                                | -                                  | NA                               |

397  $i$  is the 4-level treatment scheme sequence for Objective 2 Model 2.

398 As reported in **Table 7**, the probability of an organism being resistant to at least one antibiotic  
 399 ( $\rho$ ) was similar for the different treatment combinations. Specifically, in 62%, 81%, and 35% of  
 400 cases, the probability of an organism being resistant to at least one antibiotic was higher if  
 401 animals received a bacteriostatic antimicrobial for first treatment followed by a bactericidal  
 402 antimicrobial for retreatment of BRD when compared to bacteriostatic-bacteriostatic,  
 403 bactericidal-bacteriostatic, and bactericidal-bactericidal treatment, respectively.

404 With respect to the treatment, posterior gamma ( $\gamma$ ) distributions shifted to the right in  
 405 animals that received a first line, bacteriostatic antimicrobials followed by retreatment with a  
 406 bactericidal antimicrobial (**Error! Reference source not found.. 9**). This suggests that BRD  
 407 pathogens isolated from these animals would be more likely to test resistant to more than one  
 408 antimicrobial (**Table 5**). The probability of obtaining a resistant isolate from an animal receiving  
 409 first-line bacteriostatic treatment followed by retreatment with a bactericidal antimicrobial being  
 410 higher than the other sequences was >95% (**Error! Reference source not found. 8**).

411 **Table 8. Posterior probability that the  $\gamma_i$  is greater  $\gamma_{i-1}$  ( $i$  -4-level treatment mechanism  
 412 sequence for objective 2 model 2) where  $\gamma_i$  = number of resistant tests for an isolate.**

| Objective 2 Model 2: Posterior distribution of 2-treatment sequence |                                |                                  |                                    |                                  |
|---------------------------------------------------------------------|--------------------------------|----------------------------------|------------------------------------|----------------------------------|
|                                                                     | bactericidal +<br>bactericidal | bactericidal +<br>bacteriostatic | bacteriostatic +<br>bacteriostatic | bacteriostatic +<br>bactericidal |
| bactericidal +<br>bactericidal                                      | NA                             | 0.2                              | 0.11                               | 0.95                             |
| bactericidal +<br>bacteriostatic                                    | -                              | NA                               | 0.32                               | 0.99                             |
| bacteriostatic +                                                    | -                              | -                                | NA                                 | 1                                |

|                  |   |   |   |    |
|------------------|---|---|---|----|
| bacteriostatic   |   |   |   |    |
| bacteriostatic + | - | - | - | NA |
| bactericidal     |   |   |   |    |

413  $i$  is the 4-level treatment mechanism sequence for Objective 2 Model 2.

414 **Fig. 9. Posterior distributions of the probability that the isolate is resistant to multiple**  
 415 **antimicrobials (i.e.,  $\gamma_i$ ) stratified by the expected in-vitro activity (i.e. bactericidal or**  
 416 **bacteriostatic) of first and second treatment. Cidal-Cidal = bactericidal first treatment**  
 417 **followed by bactericidal retreatment, Cidal-Static = bactericidal first treatment followed by**  
 418 **bacteriostatic retreatment, Static-Static = bacteriostatic first treatment followed by**  
 419 **bacteriostatic retreatment and Static-Cidal = bacteriostatic first treatment followed by**  
 420 **bactericidal retreatment.**

421 These exploratory data suggest that treatment protocols stipulating first-line treatment  
 422 with a bacteriostatic antimicrobial followed by retreatment with a bactericidal antimicrobial may  
 423 be associated with an increased frequency of resistant BRD pathogen isolation. This observation  
 424 may be due to the fact that bacteriostatic activity may antagonize the effect of bactericidal drugs.  
 425 More specifically, bactericidal drugs act on bacteria that are in a growth phase; thus, the  
 426 inhibitory activity of a bacteriostatic drug on the replication of bacteria may result in diminished  
 427 activity of a subsequent bactericidal treatment [26].

428 To our knowledge, this survey is the first report that specifically considers AMR in  
 429 livestock in the context of retreatments by different classes of antimicrobials (i.e., bacteriostatic  
 430 and bactericidal) as well as different individual drugs (i.e., tulathromycin versus enrofloxacin).  
 431 As such, this report provides insights into potential critical control points for antimicrobial  
 432 stewardship in livestock production systems. For example, the heat map (**Fig. 2**) highlights how



433 various antimicrobial combinations may influence changes in AMR profiles. Specifically, the  
434 combination of tulathromycin as the first-line treatment and ceftiofur as the second-line  
435 treatment increased the number of resistant isolates for all antimicrobial agents tested. In  
436 contrast, the use of ceftiofur as the first-line treatment and tulathromycin as the second-line  
437 treatment also led to an increase in the number of resistant isolates, but not to the same degree as  
438 when tulathromycin was the first antimicrobial used. The use of tildipirosin as the first-line  
439 treatment and ceftiofur as the second-line treatment also caused an increased number of isolates  
440 showing resistant phenotypes, but this increase was not as great as when tulathromycin was the  
441 first-line treatment. Tulathromycin and tildipirosin are in the same class of antimicrobials and  
442 have similar mechanisms of action. Bacterial pre-exposure to antimicrobials has been implicated  
443 as an important risk factor for AMR evolution during subsequent antimicrobial treatments  
444 [24,27,28]. Recently, the effect of sequential antimicrobial treatments on the development of  
445 antimicrobial resistance has been demonstrated for *Pseudomonas aeruginosa* and *Klebsiella*  
446 *pneumonia* in-vitro. In these laboratory studies the emergence of antimicrobial resistance also  
447 varied with the classes and concentrations of antimicrobials used for pre-exposure and sequential  
448 treatments [28,29].

449       Macrolides, such as tulathromycin and tildipirosin, are appealing as first-line treatments  
450 for the control of BRD (metaphylaxis) in high risk cattle due to their efficacy and long residence  
451 times in plasma and tissues. Therefore, tulathromycin is one of the most frequently used  
452 antimicrobial drugs for metaphylaxis in the US [5]. However, metaphylaxis treatment with  
453 tulathromycin has been associated with a high prevalence of multidrug resistant *M. haemolytica*  
454 shedding in cattle [23,30]. One explanation for the elevated antimicrobial resistance of *M.*  
455 *haemolytica* and *P. multocida* is the long elimination half-life of macrolides results in prolonged

456 exposure to low concentrations of the bacteriostatic agent, which may be contributing to the  
457 development of AMR. During minimal inter-treatment intervals of 3–5 days, macrolides are still  
458 present at appreciable concentrations that may allow for drug-drug interactions when a second  
459 antimicrobial treatment is administered. Therefore, longer inter-treatment intervals are  
460 recommended when using antimicrobials with longer elimination half-lives [17]. Unfortunately  
461 the interval between treatments was not recorded on the submission histories analyzed for the  
462 present study and so the impact of post-treatment interval on the emergence of AMR could not  
463 be assessed.

464 Our data suggest that the number of treatments as well as altering antimicrobial classes  
465 may impact antimicrobial resistance patterns. Damas *et al.* used three antimicrobial classes  
466 (penicillins, cephalosporins, and fluoroquinolones) to treat serious infections in intensive care  
467 unit patients for 8-month periods over a 2-year duration. After studying the effect of the  
468 sequential use of these three antimicrobial classes, antimicrobial rotation was associated with a  
469 higher risk for the development of antimicrobial resistance [31].

470 Differences between resistance patterns were displayed by the MIC distributions of *M.*  
471 *haemolytica*. With the exception of ceftiofur and florfenicol, the numbers of resistant *M.*  
472 *haemolytica* isolates were greater when different antimicrobial classes were used (**Figs. 1 & 2**).  
473 However, the number of susceptible *M. haemolytica* isolates did not differ with antimicrobial  
474 classes. In general, resistance to ceftiofur was rare, even in isolates obtained from animals treated  
475 with different antimicrobial classes. However, it is speculated that CLSI-approved breakpoints  
476 may not be accurate for ceftiofur against *M. haemolytica* and *P. multocida* for treatment of  
477 respiratory disease. It is known that exposure to antimicrobials offers an advantage to resistant  
478 mutants in competition with the susceptible wild-type population; however, the impact of

479 multidrug combinations of different classes on positive selection of resistant mutants has not  
480 been closely examined [32]. In a previous report, authors measured the ratio change of  
481 doxycycline-resistant and doxycycline-sensitive *E. coli* following treatment with doxycycline  
482 alone or in combination with erythromycin. The doxycycline-resistant mutants outnumbered  
483 the susceptible wild-type population of *E.coli* in both treatment conditions, but there was  
484 greater selection for the resistant mutants with the combination treatment [33]. In line with  
485 these reports, our study also suggests that using a combination of different classes of  
486 antimicrobials may increase the risk of selection of resistant mutants.

487 Our ability to assess the impact of different drug classes on AMR for *P. multocida* and *H.*  
488 *somni* was limited in the present study due to the relatively small number of isolates with  
489 associated treatment histories that were available for analysis. However, it is known that the MIC  
490 distribution for *P. multocida* and *H. somni* may not have the same pattern as *M. haemolytica*  
491 isolates. In a previous report, pre-exposure to tulathromycin developed bacterial resistance in *M.*  
492 *haemolytica* but not in *P. multocida* [34]. The number of *M. haemolytica* isolates compared to  
493 the number of *P. multocida* and *H. somni* isolates may influence the observations of this study.  
494 Regardless, the use of different mechanistic classes of antimicrobials may lead to a greater  
495 number of resistant isolates. Van Loon *et al.* reported that bacteria exhibit reduced susceptibility  
496 during treatment with variation in the classes of antimicrobials [35].

497 Though drug resistance has been a concern of scientists for decades, and specific BRD  
498 pathogen resistance was first reported over 40 years ago [36], our study appears to be the first  
499 thorough investigation of the effects of treatment number and type on subsequent AMR isolates  
500 in cattle with BRD. More recent investigations of resistance to individual drugs are more  
501 extensive and characterize AMR among BRD pathogens after treatment with tetracyclines,

502 macrolides, beta-lactams, fluoroquinolones, sulphonamides, phenicols, aminoglycosides, and  
503 lincosamides [8,11,12,13,14]. The current study is representative, though non-exhaustive, and  
504 exhibits a novel approach for AMR microbe analysis in BRD because multiple treatments of  
505 various drugs and antimicrobial classes are evaluated.

506         The impact of multiple antimicrobial treatments represents an understudied area of  
507 research in veterinary medicine. It has been shown that feedlot cattle are routinely treated with  
508 antimicrobials more than once if the initial response is inadequate; however, cattle that receive  
509 multiple antimicrobial treatments exhibit higher mortality rates from disease [5]. Furthermore,  
510 animals that fail to respond to the initial treatment with one class of drug (e.g., bacteriostatic) are  
511 usually retreated with a different class of drug (e.g., bactericidal), which suggests a lack of  
512 consensus on any particular retreatment protocol [5]. This lack of consensus is likely due to the  
513 scarcity of literature on pathogen response to multiple treatment regimens with different classes  
514 of antimicrobial agents. Our study suggests that sequential treatment with different classes of  
515 antimicrobials is a risk factor for developing drug resistance. Therefore, a review of  
516 antimicrobial pre-exposure should be taken before the initiation of subsequent antimicrobial  
517 therapy to prevent the emergence of antimicrobial resistance in cattle infected with BRD.

518         As concern about the impact of AMR microbes on animal and public health increase,  
519 additional knowledge from studies such as the current one are needed to investigate interventions  
520 that reduce the development of antimicrobial resistance. Furthermore, a microbiological  
521 diagnosis should be established before using broad-spectrum antimicrobials to treat BRD of  
522 unknown etiology. Unfortunately, the amount of time it takes to obtain AMR isolate results and  
523 the associated costs are two major limitations for the use of laboratory microbiology in  
524 veterinary medicine [25]. Furthermore, this study demonstrates the value and importance of

525 including comprehensive treatment histories to accompany the submission of veterinary  
526 diagnostic laboratory samples. The current study of antimicrobial sensitivity patterns in a region  
527 can guide veterinarians to choose safer and more effective treatment protocols. Future studies on  
528 antimicrobial resistance could facilitate decision-making when animals contained in feedlots  
529 exhibit chronic illness and there is the potential need for multiple treatments with antimicrobial  
530 agents.

### 531 **Key results**

532         These exploratory data suggest that treatment protocols stipulating first-line treatment  
533 with a bacteriostatic followed by second-line treatment with a bactericidal may increase the  
534 probability that drug resistance develops. As concern about antimicrobial resistance increases  
535 from an animal and public health perspective, this knowledge suggests potential ways to reduce  
536 the development of resistance. The hypothesis that the impact of an antimicrobial on bacterial  
537 growth may be associated with the risk of increased resistance needs to be tested in a clinical  
538 trial. Such a trial would also need to determine whether treatment efficacy is affected by a  
539 change in treatment protocol or post-treatment interval. If treatment effectiveness proves to be  
540 the same, then we may have an avenue by which to reduce the induction of resistance via the  
541 recommendation that veterinarians tailor their treatment regimens to reduce the potential for  
542 AMR development.

### 543 **Strengths and limitations**

544         Although this study is hypothesis-generating, it has several strengths. The data set is  
545 reasonably large for the questions we asked. Although a great deal of data were missing, we  
546 limited our analysis to specific questions to avoid impact due to this missing data. Furthermore,  
547 we recognized the limits of the passively collected and hypothesis-generating nature of the data

548 by not formally testing a hypothesis. The zero-inflated beta-binomial model that we used is an  
549 intuitive model that fit the underlying data well. We could not adjust this model for any  
550 confounders because of missing data; however, given the cross-sectional nature of the data, any  
551 attempt to adjust for confounders to improve causal inference would have been misleading and  
552 was thus avoided.

### 553 **Interpretation and generalizability**

554 Our overall interpretation of the data suggests that there is direct correlation between the  
555 number of treatments to which an animal was exposed and the emergence of treatment  
556 resistance. In addition, sequential treatments of BRD and the use of antimicrobials with different  
557 mechanisms of antibacterial activity (i.e., -static versus -cidal) may serve as a risk factor for the  
558 development of AMR.

559

### 560 **Declaration of conflicting interests**

561 JFC: Has been a consultant for Intervet-Schering Plough Animal Health (now Merck Animal  
562 Health), Bayer Animal Health, Boehringer-Ingelheim Vetmedica, Zoetis Animal Health, and  
563 Norbrook Laboratories Ltd.

564 DRM: No conflicts of interest.

565 LF: No funding from companies that manufacture pharmaceuticals mentioned in the manuscript.

566 PKS: No conflicts of interest.

567 AMS: No conflicts of interest.

568 ACK: No conflicts of interest.

569 VLC: No conflicts of interest.

570 TJE: No conflicts of interest.

571 AOC: Has been a consultant for Bayer Animal Health.

572

## 573 **Authorship declarations**

574 JFC: Conceived the study, provided study guidance and relevant interventions, interpreted the  
575 results, and prepared and approved the final manuscript.

576 DRM: Conceived the original retrospective work, participated in data collection and  
577 interpretation of the results, and approved the final manuscript.

578 LF: Conducted the Bayesian analysis, including writing the code.

579 PKS: Participated in compiling and interpreting the results and preparation of the manuscript,  
580 and approved the final manuscript.

581 AMS: Participated in compiling and interpreting the results and preparation of the manuscript,  
582 and approved the final manuscript.

583 ACK: Participated in the antimicrobial susceptibility testing, interpretation of the results, and  
584 preparation of the manuscript, and approved the final manuscript.

585 VLC: Participated in compiling and interpreting the results and preparation of the manuscript,  
586 and approved the final manuscript.

587 TJE: Participated in compiling and interpreting the results and preparation of the manuscript, and  
588 approved the final manuscript.

589 AOC: Conducted the descriptive analysis and assisted with the Bayesian analysis, prepared the  
590 draft of the statistical methods and results, and approved the final manuscript.

591

## 592 **Publication declaration**

593           The authors declare that this is a full and accurate description of the project and no  
594 important information or analyses are omitted. A second paper provides a detailed description of  
595 the results for the individual antimicrobials

## 596 **Acknowledgments**

597           We would like to thank Pete Walsh for helping with some of the descriptive coding.

## 598 **Sponsorship**

599           No external funding agency provided financial or material support for this project.

## 600 **Sources and manufacturers**

601           a. BOPO6F, Thermo Scientific, Oakwood Village, OH.

602           b. Sensititre AIM, Thermo Scientific, Oakwood Village, OH.

603           c. Sensititre Vizion System, Thermo Scientific, Oakwood Village, OH.

## 604 **Data availability statement**

605           The data that support the findings of this study are available from the Iowa State  
606 University Veterinary Diagnostic Laboratory. Restrictions apply to the availability of these data,  
607 which are not publicly available due to client confidentiality. Data are available from the authors  
608 with the permission of Iowa State University.



## 609 **References**

- 610 1. Griffin D Economic impact associated with respiratory disease in beef cattle. *Vet Clin*  
611 *North Am Food Anim Pract.* 1997; 13: 367-77.
- 612 2. Snowden GD, Van Vleck LD, Cundiff LV, Bennett GL, Koohmaraie M, Dikeman ME. Bovine  
613 respiratory disease in feedlot cattle: Phenotypic, environmental, and genetic correlations  
614 with growth, carcass, and longissimus muscle palatability traits. *J. Anim. Sci.* 2007; 85:  
615 1885–1892.
- 616 3. Sanderson MW, Dargatz DA, Wagner BA Risk factors for initial respiratory disease in United  
617 States' feedlots based on producer-collected daily morbidity counts. *Can Vet J.* 2008; 49:  
618 373-8.
- 619 4. Miles DG, Rogers KC BRD control: tying it all together to deliver value to the industry.  
620 *Anim Health Res Rev.* 2014;15: 186-8.
- 621 5. USDA–APHIS–VS: National Animal Health Monitoring System Beef Feedlot Study  
622 2011. Part IV: Health and Health Management on U.S. Feedlots with a Capacity of 1,000  
623 or More Head. 2013. Available from:  
624 [https://www.aphis.usda.gov/animal\\_health/nahms/feedlot/downloads/feedlot2011/Feed11\\_dr\\_Pa](https://www.aphis.usda.gov/animal_health/nahms/feedlot/downloads/feedlot2011/Feed11_dr_PartIV.pdf)  
625 [rtIV.pdf](https://www.aphis.usda.gov/animal_health/nahms/feedlot/downloads/feedlot2011/Feed11_dr_PartIV.pdf)
- 626 6. Fales WH, Selby LA, Webber JJ, Hoffman LJ, Kintner LD, Nelson SL, et al. Antimicrobial  
627 resistance among *Pasteurella* spp recovered from Missouri and Iowa cattle with bovine  
628 respiratory disease complex. *J Am Vet Med Assoc.*1982; 181:477-9.
- 629 7. Welsh RD, Dye LB, Payton ME, Confer AW Isolation and antimicrobial susceptibilities of  
630 bacterial pathogens from bovine pneumonia: 1994--2002. *J Vet Diagn Invest.* 2004; 16:  
631 426-31, 2004.

- 632 8. Klima CL, Alexander TW, Read RR, Gow SP, Booker CW, Hannon S, Selinger LB Genetic  
633 characterization and antimicrobial susceptibility of *Mannheimia haemolytica* isolated from  
634 the nasopharynx of feedlot cattle. *Vet Microbiol.* 2011; 149(3-4): 390-398.
- 635 9. Lubbers BV, Hanzlicek GA Antimicrobial multidrug resistance and coresistance patterns of  
636 *Mannheimia haemolytica* isolated from bovine respiratory disease cases--a three-year  
637 (2009-2011) retrospective analysis. *J Vet Diagn Invest.* 2013; 25: 413-7.
- 638 10. Magstadt DR, Schuler AM, Coetzee JF, Krull AC, O'Connor AM, Cooper VL, Engelken  
639 TJ. Treatment history and antimicrobial susceptibility results for *Mannheimia haemolytica*,  
640 *Pasteurella multocida*, and *Histophilus somni* isolates from bovine respiratory disease cases  
641 submitted to the Iowa State University Veterinary Diagnostic Laboratory from 2013-2015.  
642 *J Vet Diagn Invest.* 2018; 30: 99-104.
- 643 11. Watts JL, Sweeney MT Antimicrobial resistance in bovine respiratory disease pathogens:  
644 measures, trends, and impact on efficacy. *Vet Clin North Am Food Anim Pract.* 2010; 26:  
645 79-88.
- 646 12. Michael GB, Kadlec K, Sweeney MT, Brzuszkiewicz E, Liesegang H, Daniel R, et al.  
647 ICE Pmu1, an integrative conjugative element (ICE) of *Pasteurella multocida*: analysis of  
648 the regions that comprise 12 antimicrobial resistance genes. *J Antimicrob Chemother.*  
649 2011; 67(1): 84-90.
- 650 13. Pardon B, Hostens M, Duchateau L, Dewulf J, De Bleecker K, Deprez P. Impact of  
651 respiratory disease, diarrhea, otitis and arthritis on mortality and carcass traits in white  
652 veal calves. *BMC Vet Res.* 2013; 9(1): 79.
- 653 14. Woolums AR, Karish BB, Frye JG, Epperson W, Smith DR, Blanton Jr, et al. Multidrug  
654 resistant *Mannheimia haemolytica* isolated from high-risk beef stocker cattle after

- 655 antimicrobial metaphylaxis and treatment for bovine respiratory disease. *Vet Microbiol.*  
656 2018; 221:143-152.
- 657 15. Clinical and Laboratory Standards Institute (CLSI). Performance standards for  
658 antimicrobial disk dilution susceptibility tests for bacteria isolated from animals. CLSI,  
659 Wayne, PA16; 2008.
- 660 16. Johnson KK and Pendell DL. Market Impacts of Reducing the Prevalence of Bovine  
661 Respiratory Disease in United States Beef Cattle Feedlots. *Front Vet Sci.* 2017; 4:  
662 189. doi: 10.3389/fvets.2017.00189
- 663 17. Apley, MD. Treatment of calves with bovine respiratory disease: duration of therapy and  
664 posttreatment intervals. *Vet Clin North Am Food Anim Pract.* 2015; 31: 441–453.
- 665 18. Anholt RM, Klima C, Allan N, Matheson-Bird H, Schatz C, Ajitkumar P, Otto SJG,  
666 Peters D, Schmid K, Olson M, McAllister T and Ralston B. Antimicrobial Susceptibility of  
667 Bacteria That Cause Bovine Respiratory Disease Complex in Alberta, Canada. *Front Vet*  
668 *Sci.* 2017; 4: 207. doi: 10.3389/fvets.2017.00207
- 669 19. Portis E, Lindeman C, Johansen L, Stoltman G. A ten-year (2000–2009) study of  
670 antimicrobial susceptibility of bacteria that cause bovine respiratory disease complex—  
671 *Mannheimia haemolytica*, *Pasteurella multocida*, and *Histophilus somni*—in the United  
672 States and Canada. *J Vet Diagn Invest.* 2012; 24: 932–44. doi:10.1177/1040638712457559
- 673 20. Klima CL, Zaheer R, Cook SR, Booker CW, Hendrick S, Alexander TW, et al. Pathogens of  
674 bovine respiratory disease in North American feedlots conferring multidrug resistance via  
675 integrative conjugative elements. *J Clin Microbiol.* 2014; 52: 438–48. doi:10.1128/JCM.02485-  
676 13

- 677 21. Noyes N, Benedict K, Gow S, Booker C, Hannon S, McAllister T, et al. *Mannheimia*  
678 *haemolytica* in feedlot cattle: prevalence of recovery and associations with antimicrobial use,  
679 resistance, and health outcomes. *J Vet Intern Med.* 2015; 29:705–13. doi:10.1111/jvim.12547
- 680 22. DeDonder KD, Apley MD. A literature review of antimicrobial resistance in pathogens  
681 associated with bovine respiratory disease. *Anim Health Res Rev.* 2015; 16:125-34.
- 682 23. Snyder E., Credille B., R. Berghaus, Giguere S. Prevalence of multi drug antimicrobial  
683 resistance in isolated from high-risk stocker cattle at arrival and two weeks after processing. *J*  
684 *Anim Sci.* 2017; 95: 1124-1131.
- 685 24. Gould IM, MacKenzie FM. Antibiotic exposure as a risk factor for emergence of resistance:  
686 the influence of concentration. *J Appl Microbiol.* 2002;92: 78S–84S.
- 687 25. De Briyne N, Atkinson J, Pokludová L, Borriello SP, Price S. Factors influencing antibiotic  
688 prescribing habits and use of sensitivity testing amongst veterinarians in Europe. *Vet Rec.*  
689 2013; 173: 475 <http://dx.doi.org/10.1136/vr.101454>
- 690 26. Ocampo PS, Lázár V, Papp B, Arnoldini M, Abel zur Wiesch P, Busa-Fekete R, Fekete  
691 G, Pál C, Ackermann M, Bonhoeffer S. Antagonism between bacteriostatic and bactericidal  
692 antibiotics is prevalent. *Antimicrob Agents Chemother.* 2014; 58(8): 4573-82. doi:  
693 10.1128/AAC.02463-14.
- 694 27. van der Horst MA, Schuurmans JM, Smid MC, Koenders BB, ter Kuile BH. De novo  
695 acquisition of resistance to three antibiotics by *Escherichia coli*. *Microb Drug Resist.* 2011;17(2):  
696 141–7.
- 697 28. Vestergaard M, Paulander W, Marvig RL, Clasen J, Jochumsen N, Molin S, et al. Antibiotic  
698 combination therapy can select for broad-spectrum multidrug resistance in *Pseudomonas*  
699 *aeruginosa*. *Int J Antimicrob Agent.* 2016; 47(1): 48–55.

- 700 29. Kim J, Jo A, Chukeatirote E, Ahn J. Assessment of antibiotic resistance in *Klebsiella*  
701 *pneumoniae* exposed to sequential in vitro antibiotic treatments. Ann Clin Microbiol Antimicrob.  
702 2016; 15:60. <https://doi.org/10.1186/s12941-016-0173-x>
- 703 30. Crosby S, Credille B, Giguère S, Berghaus R. Comparative efficacy of enrofloxacin to that of  
704 tulathromycin for the control of bovine respiratory disease and prevalence of antimicrobial  
705 resistance in *Mannheimia haemolytica* in calves at high risk of developing bovine respiratory  
706 disease. J Anim Sci. 2018; 96: 1259–1267. <https://doi.org/10.1093/jas/sky054>
- 707 31. Damas P, Canivet JL, Ledoux D, Monchi M, Melin P, Nys M, De Mol P. Selection of  
708 Resistance during sequential use of preferential antibiotic class. Intensive Care Med. 2006; 32;  
709 67– 74.
- 710 32. Levy, S. B. & Marshall, B. Antibacterial resistance worldwide: causes, challenges and  
711 responses. Nature Med. 2004; 10, S122–S129.
- 712 33. Chait R, Craney A, Kishony R. Antibiotic interactions that select against resistance.  
713 Nature. 2007; 446(7136): 668-71. DOI: 10.1038/nature05685
- 714 34. Rajamanickam K, Yang J and Sakharkar MK. Gallic Acid Potentiates the Antimicrobial  
715 Activity of Tulathromycin Against Two Key Bovine Respiratory Disease (BRD) Causing-  
716 Pathogens. Front Pharmacol. 2019; 9: 1486. doi: 10.3389/fphar.2018.01486
- 717 35. Loon HJ van, Vriens MR, Fluit AC, Troelstra A, van der Werken C, Verhoef J, Bonten  
718 M. Antibiotic rotation and development of gram-negative antibiotic resistance. Am J Respir  
719 Crit Care Med. 2005; 171: 480–487.
- 720 36. Chang WH, Carter GR. Multiple drug resistance in *Pasteurella multocida* and *Pasteurella*  
721 *haemolytica* from cattle and swine. J Am Vet Med Assoc. 1976; 169(7):710-712.
- 722

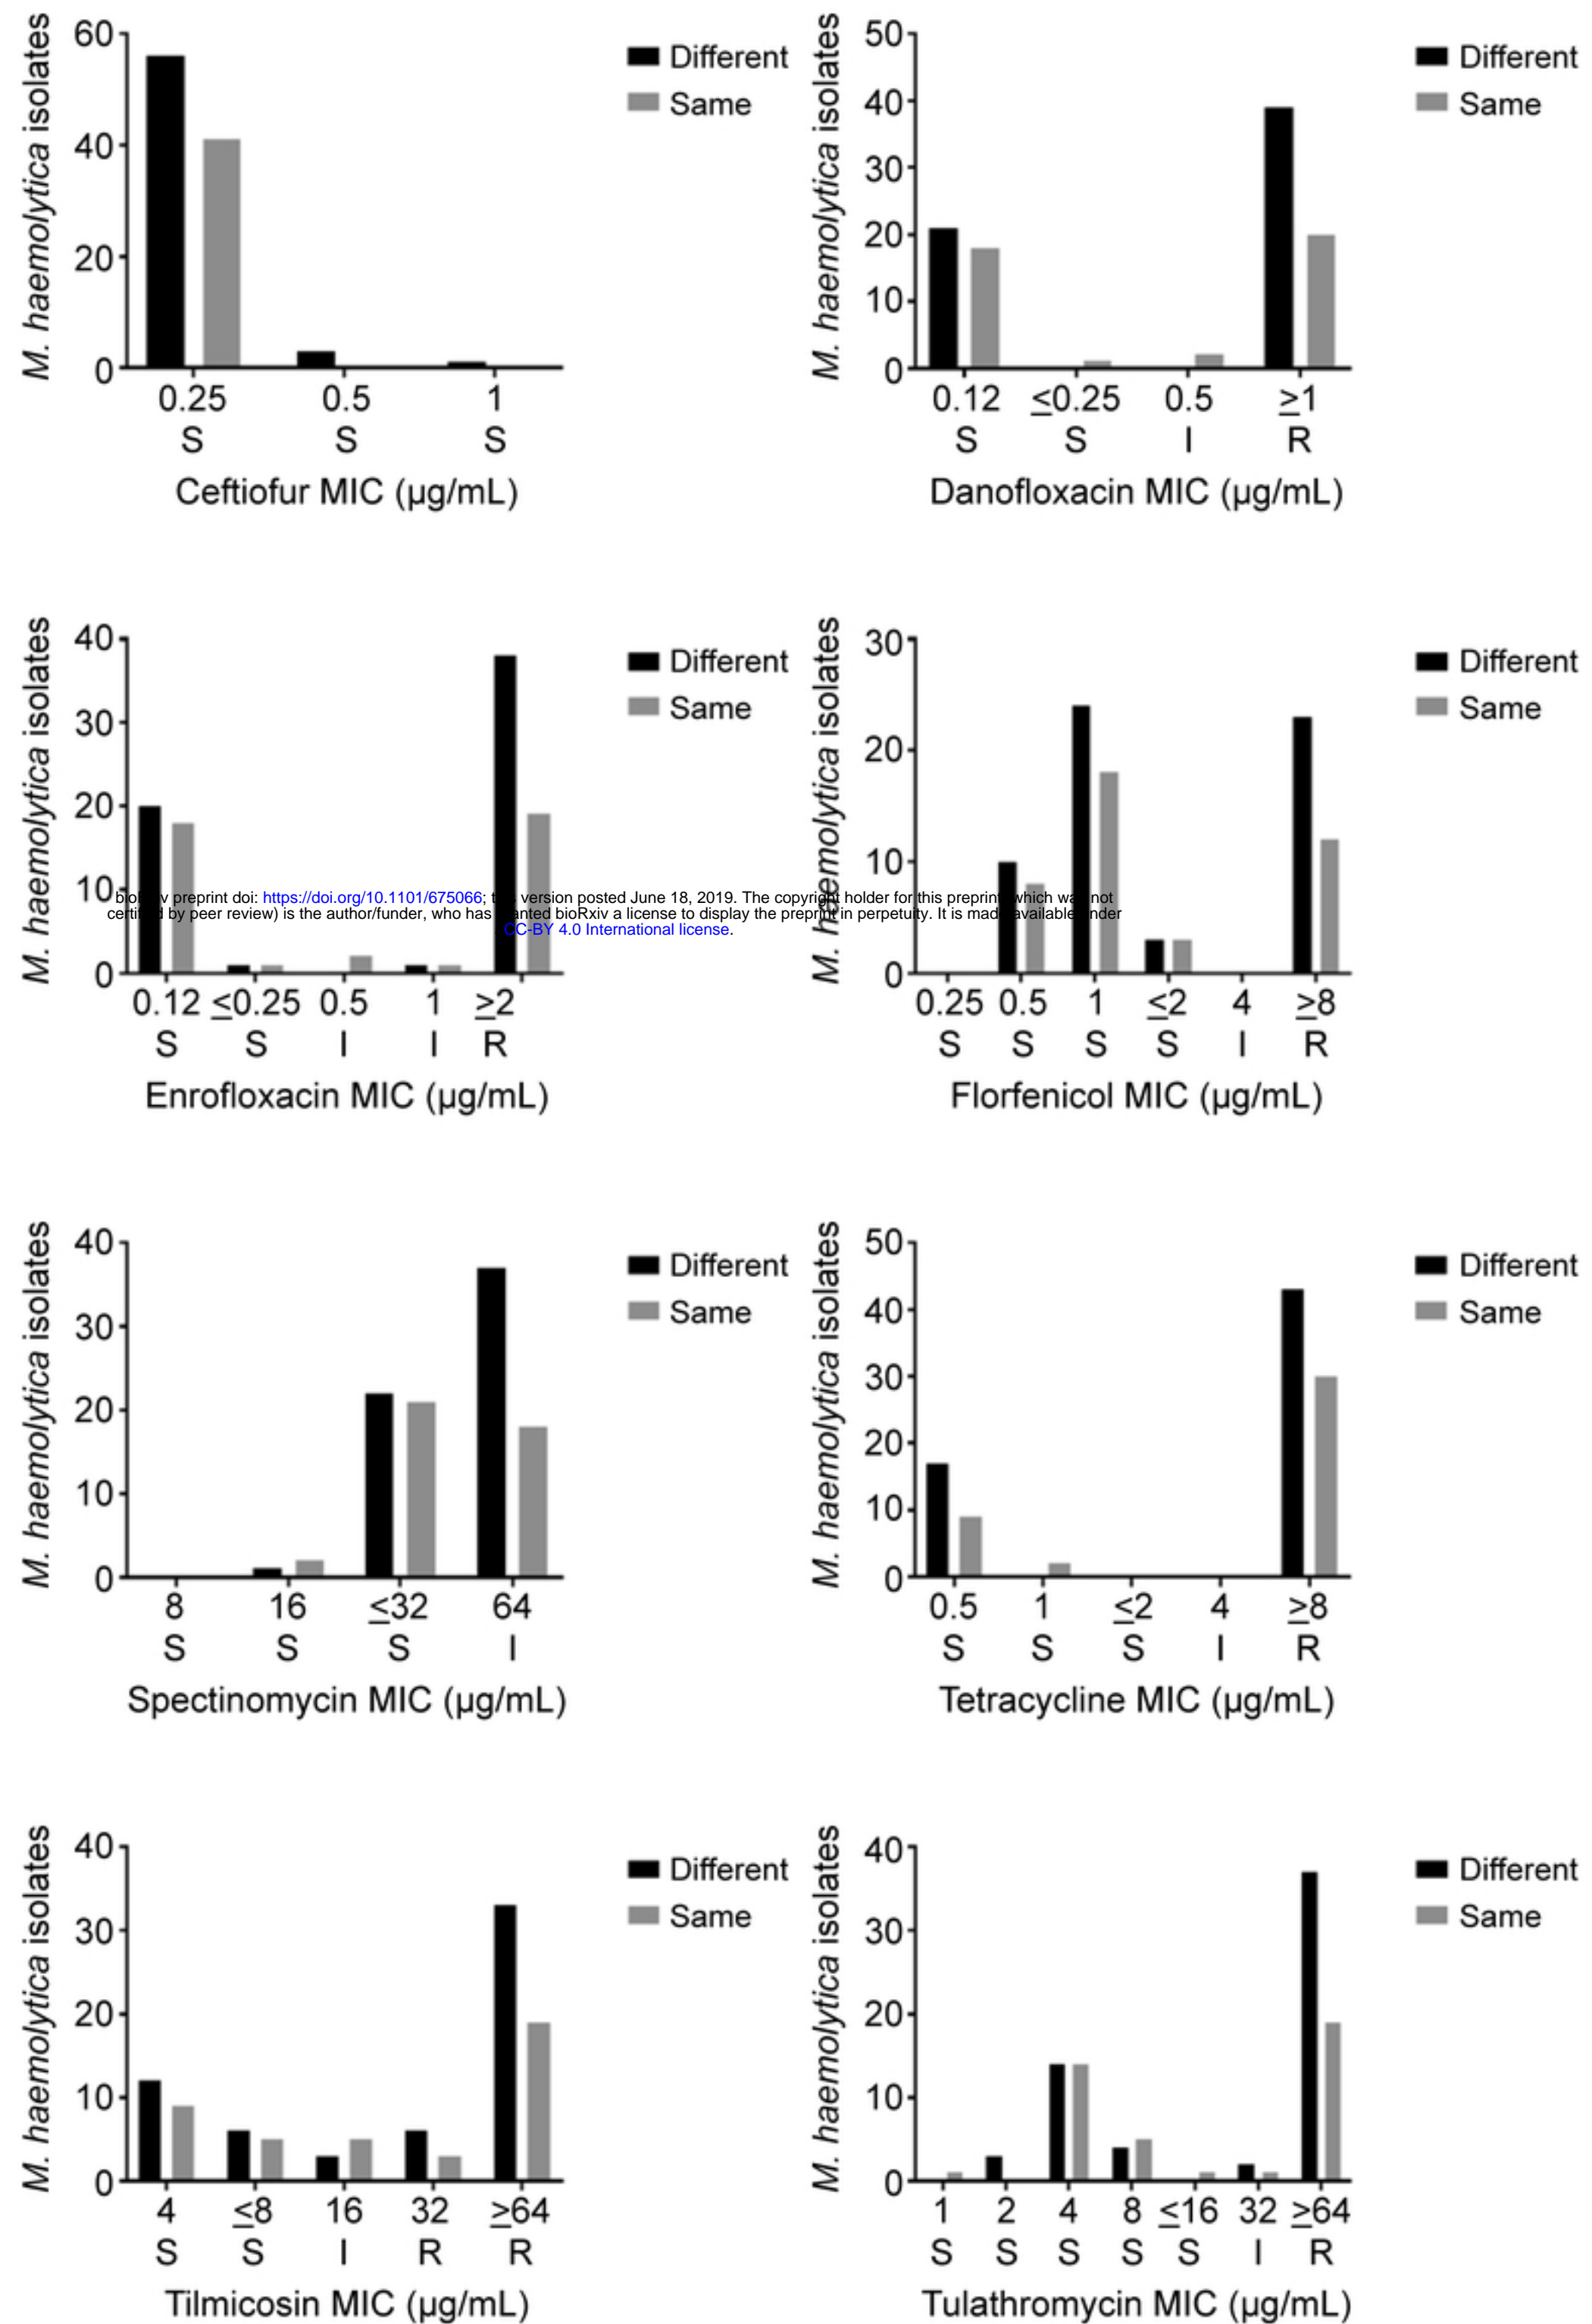

Figure 1

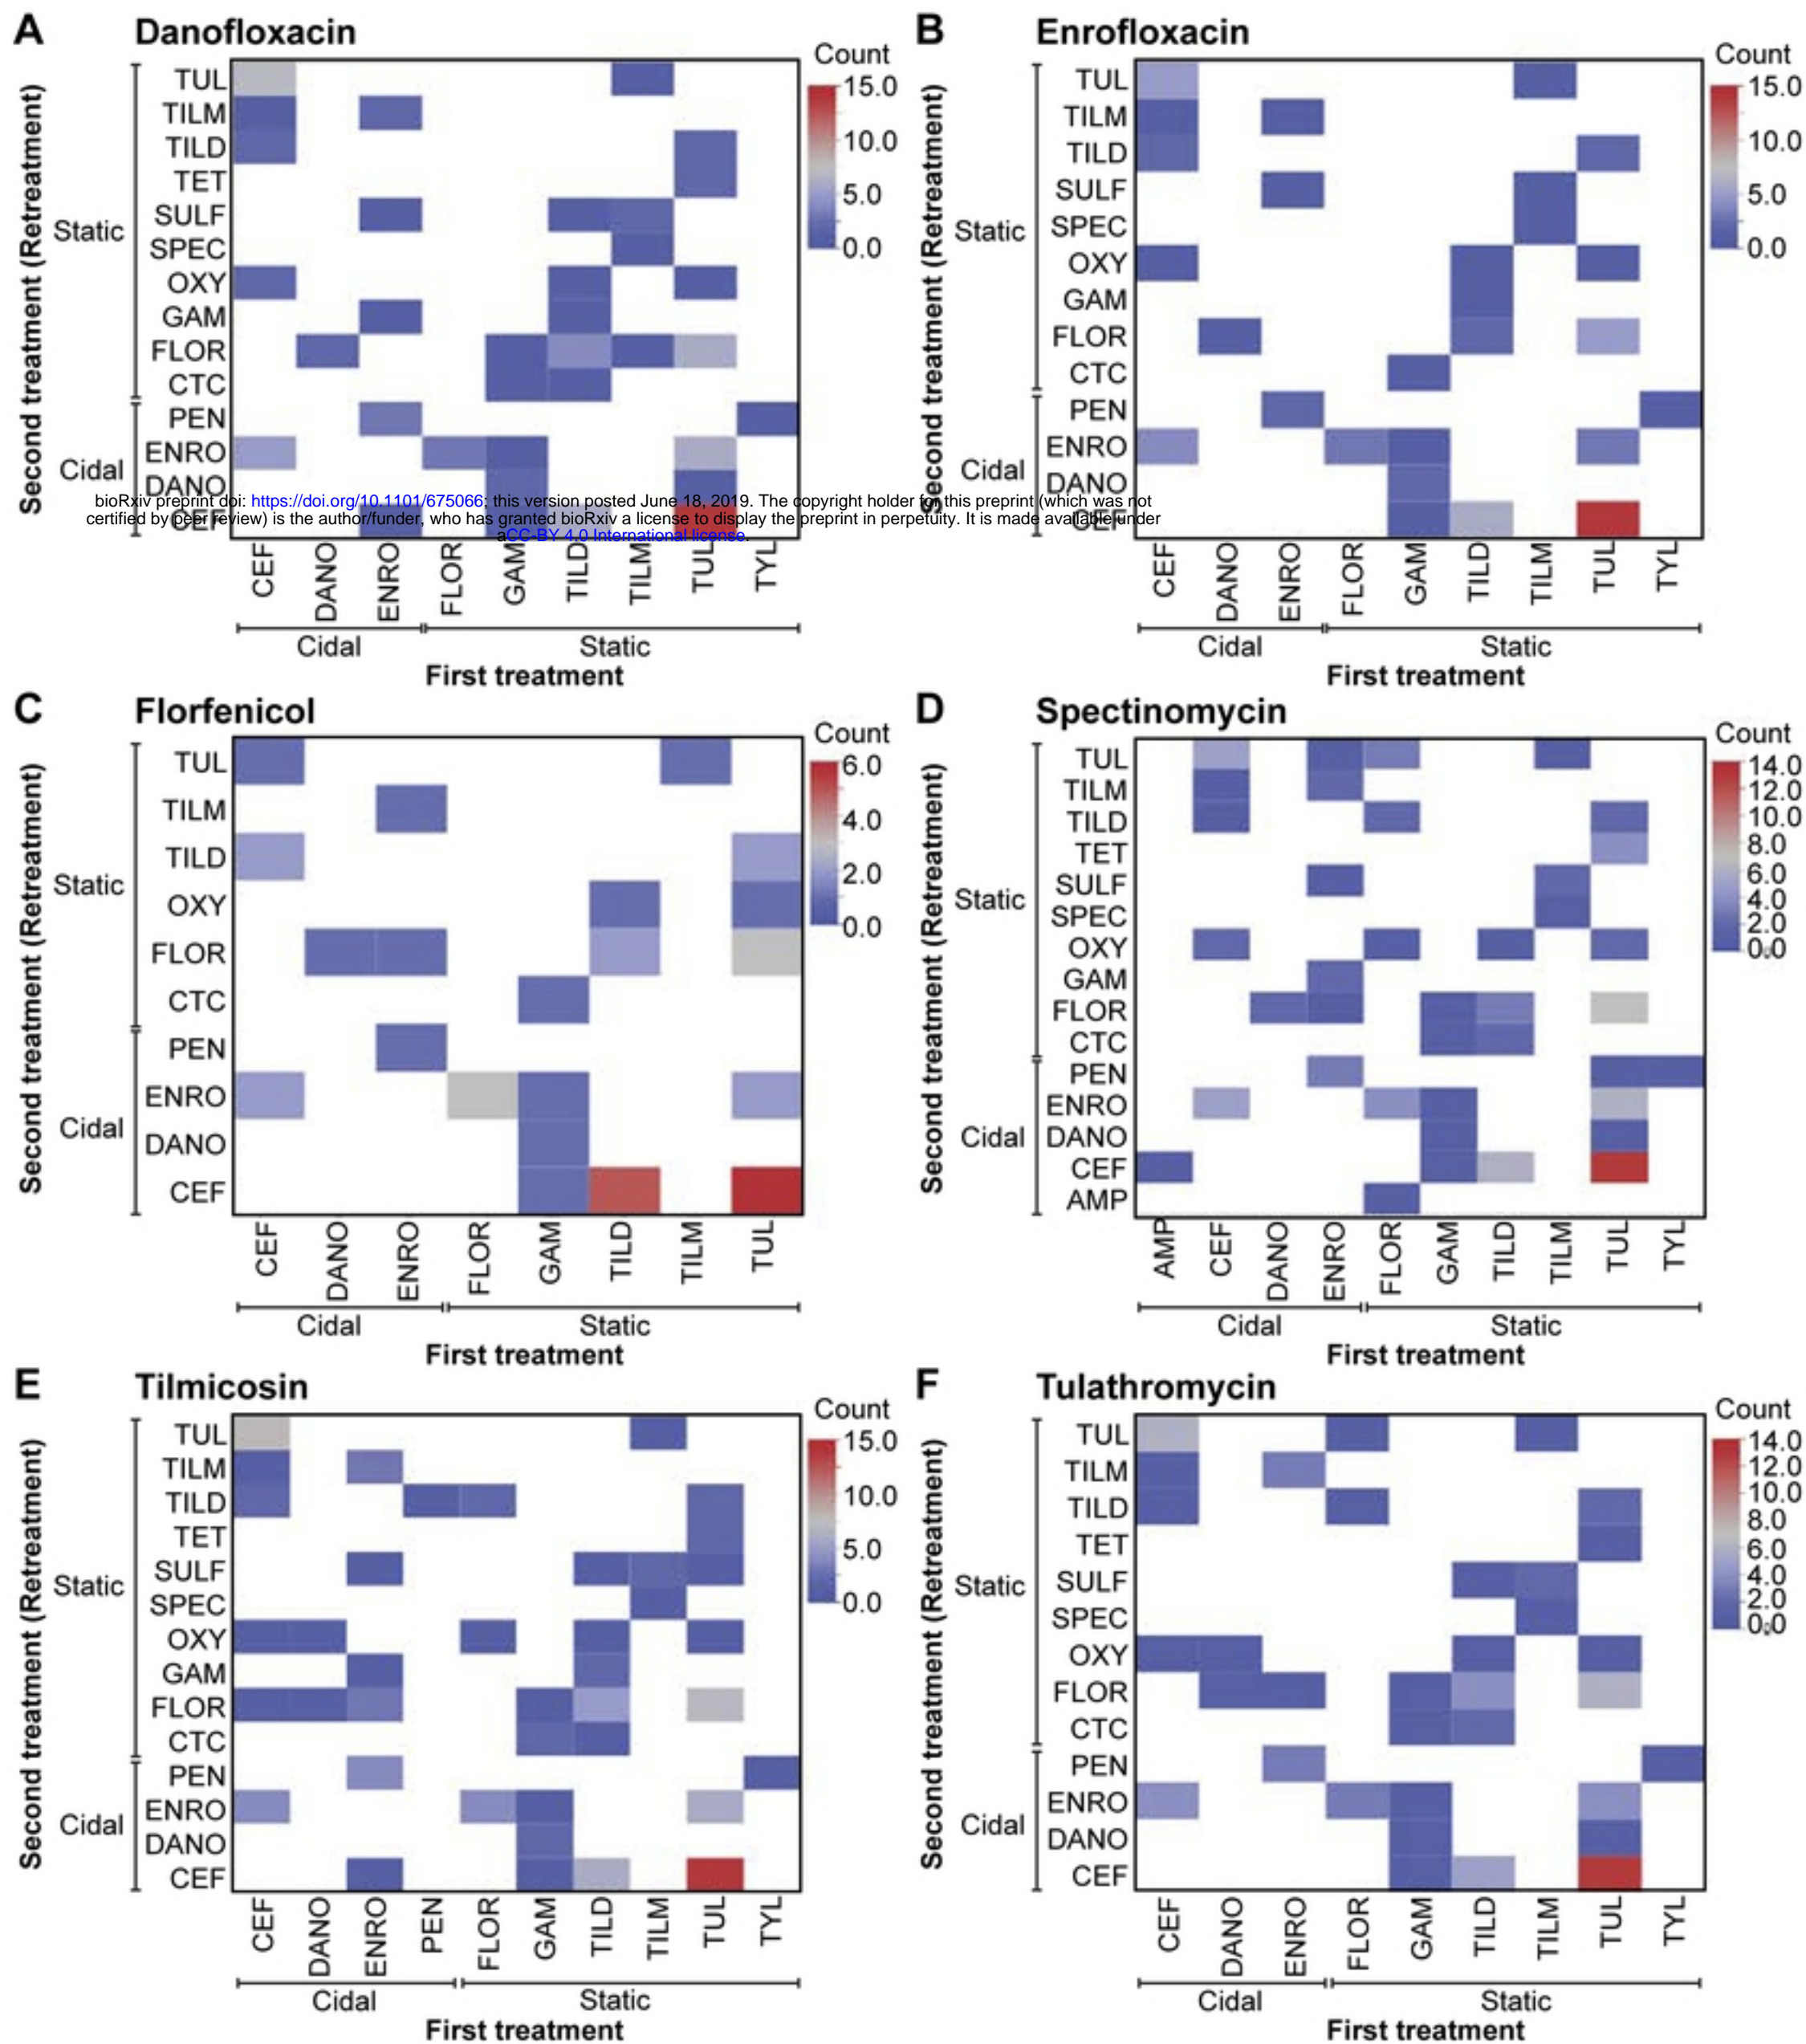

Figure 2

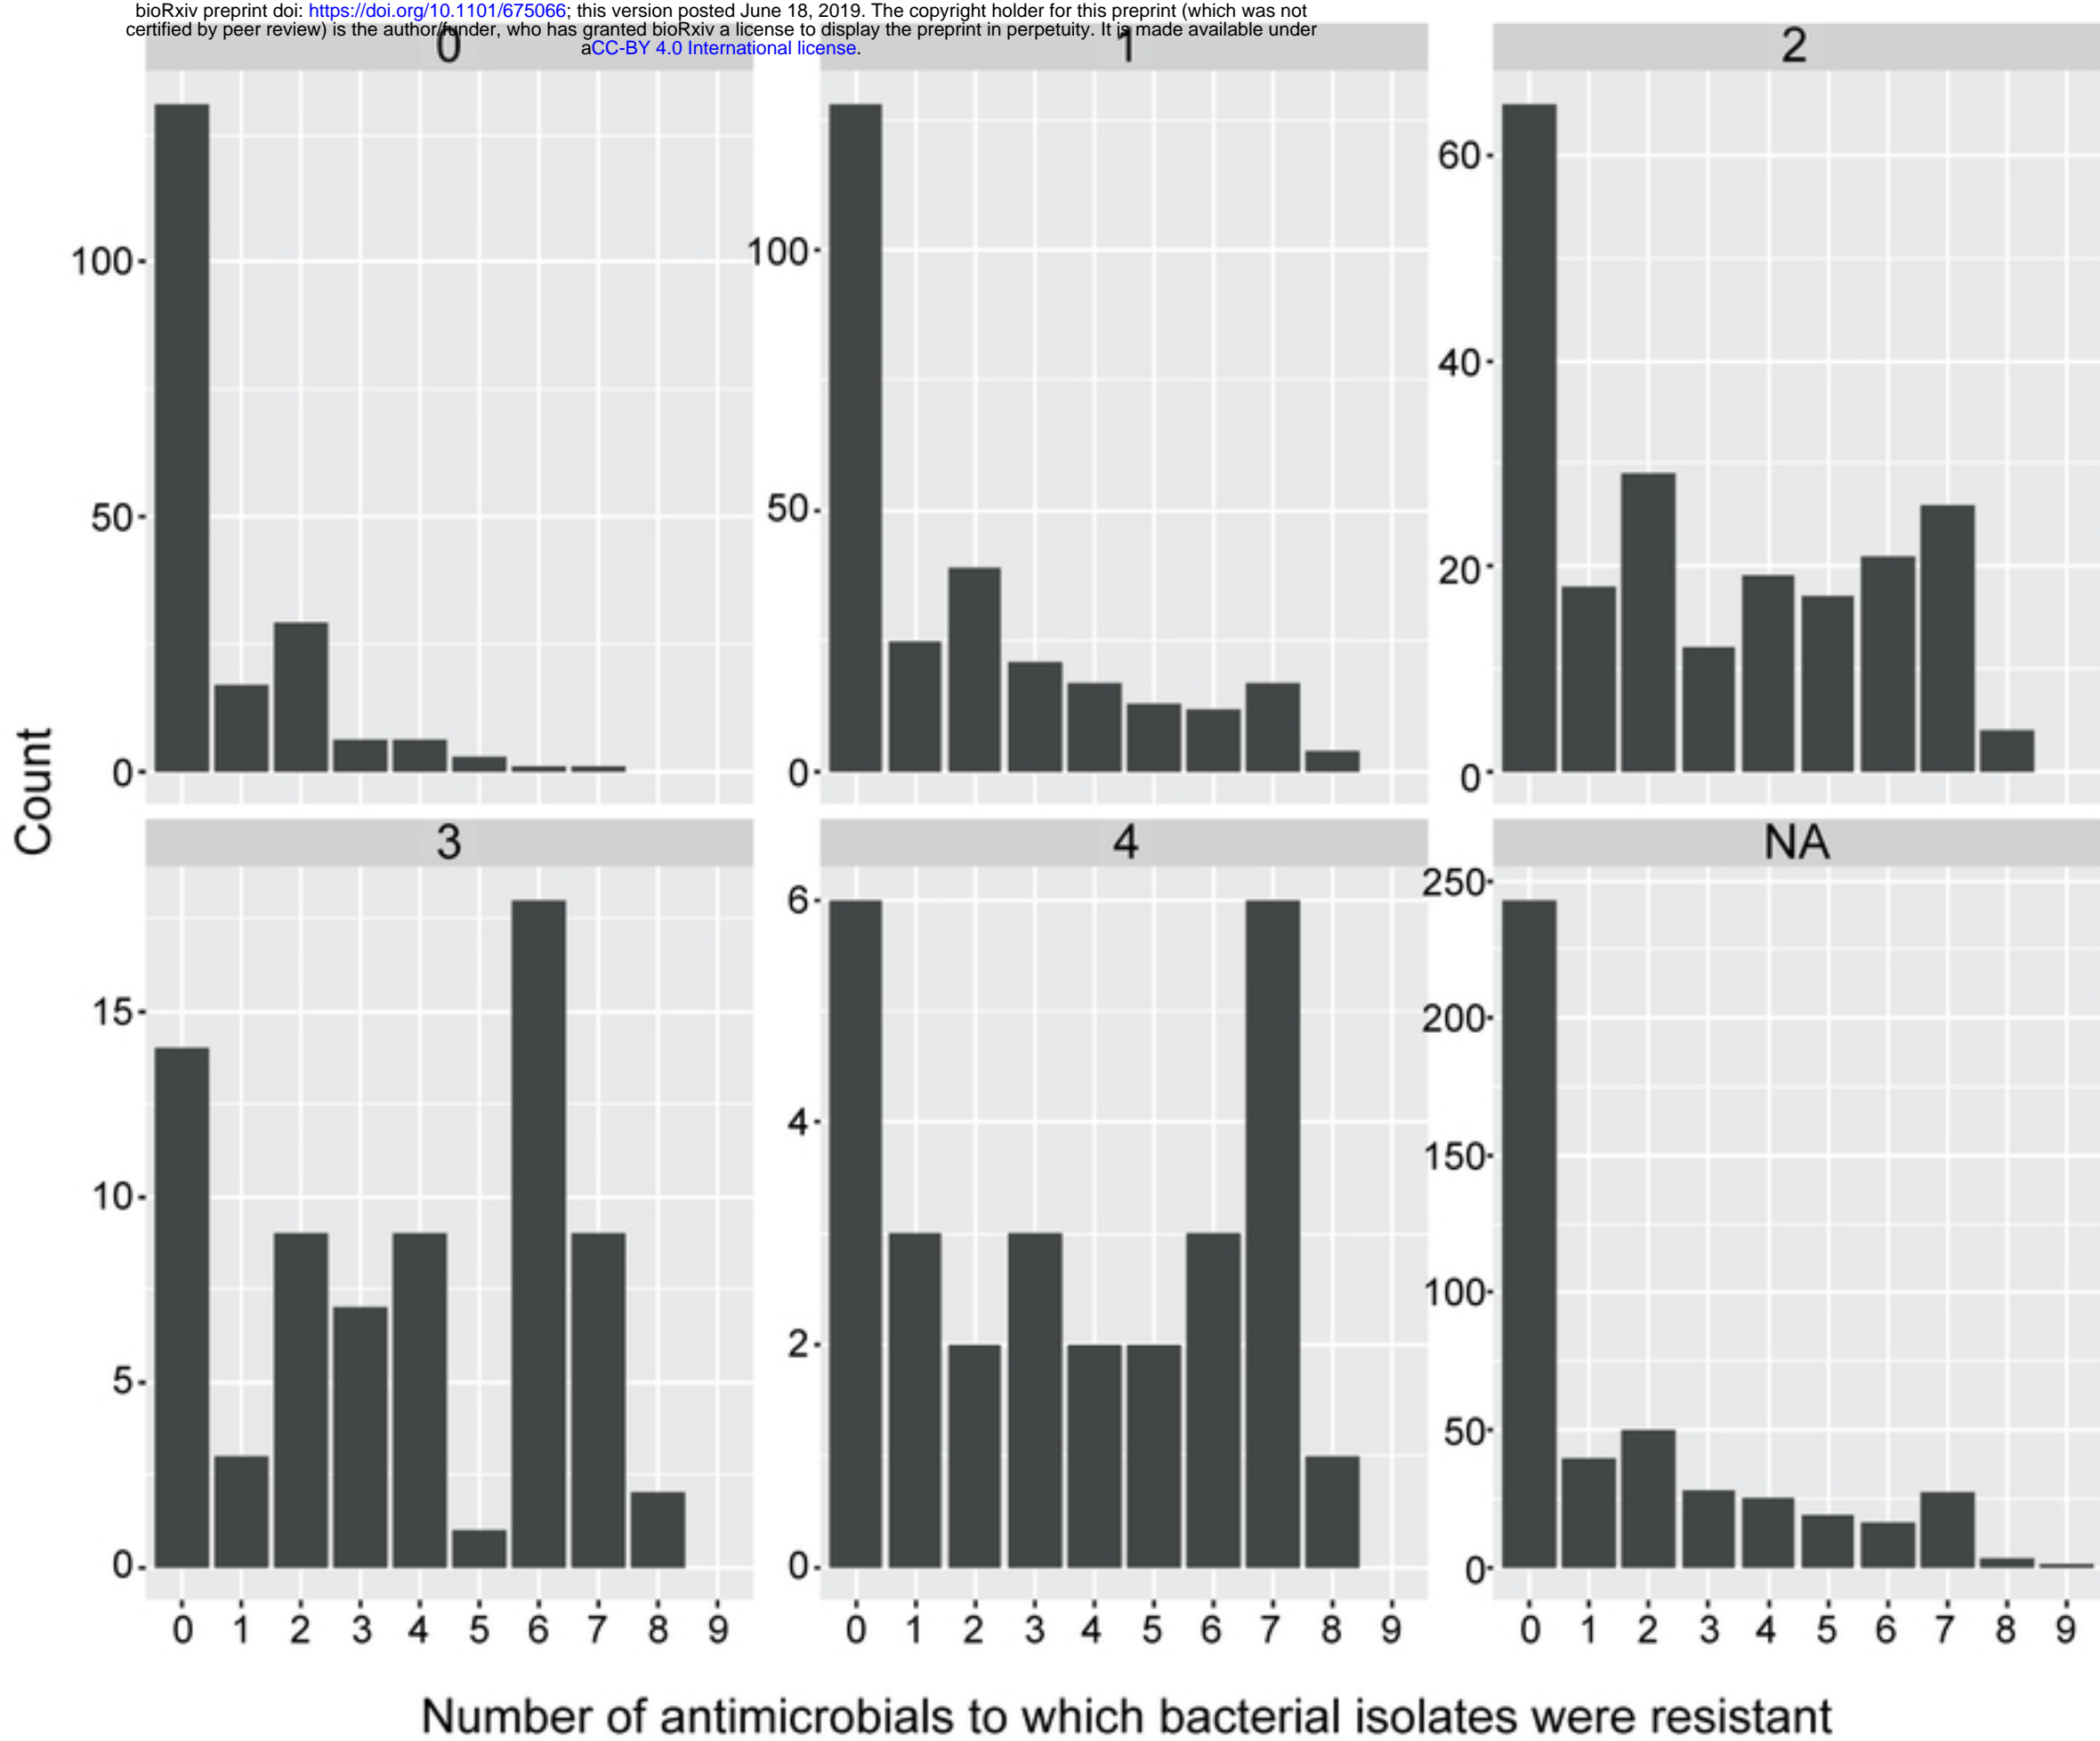

Figure 3



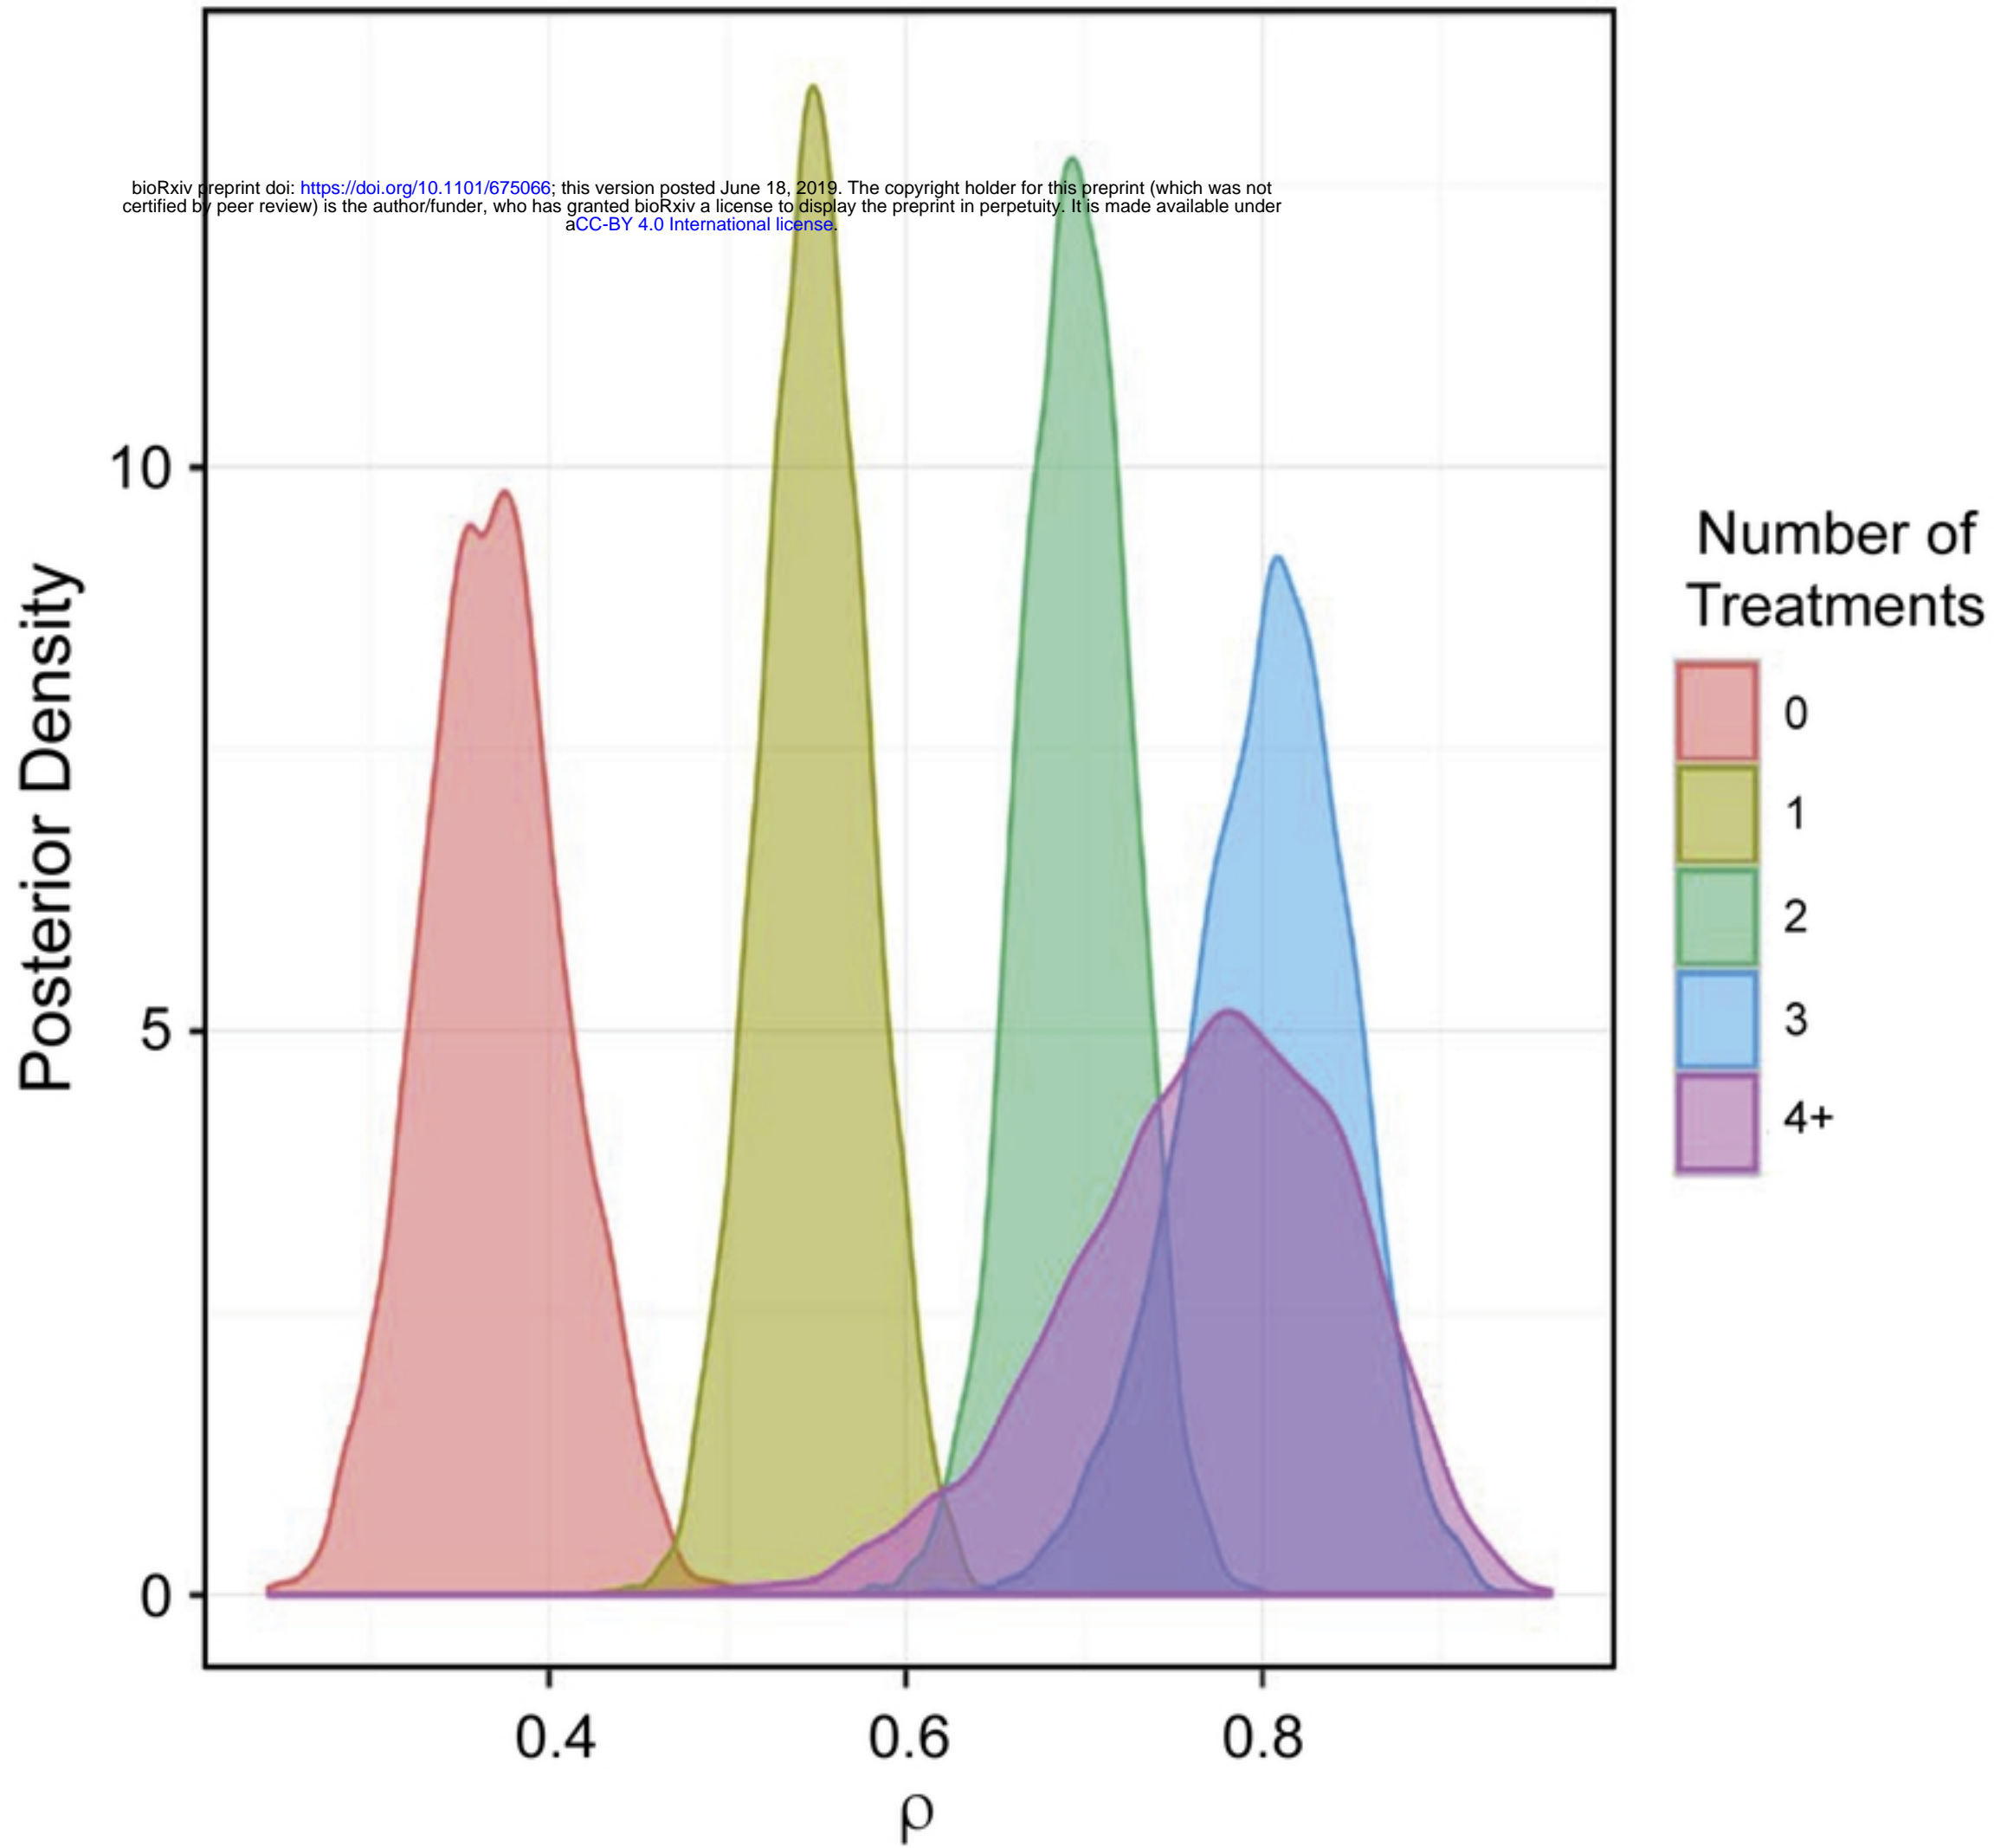

Figure 4

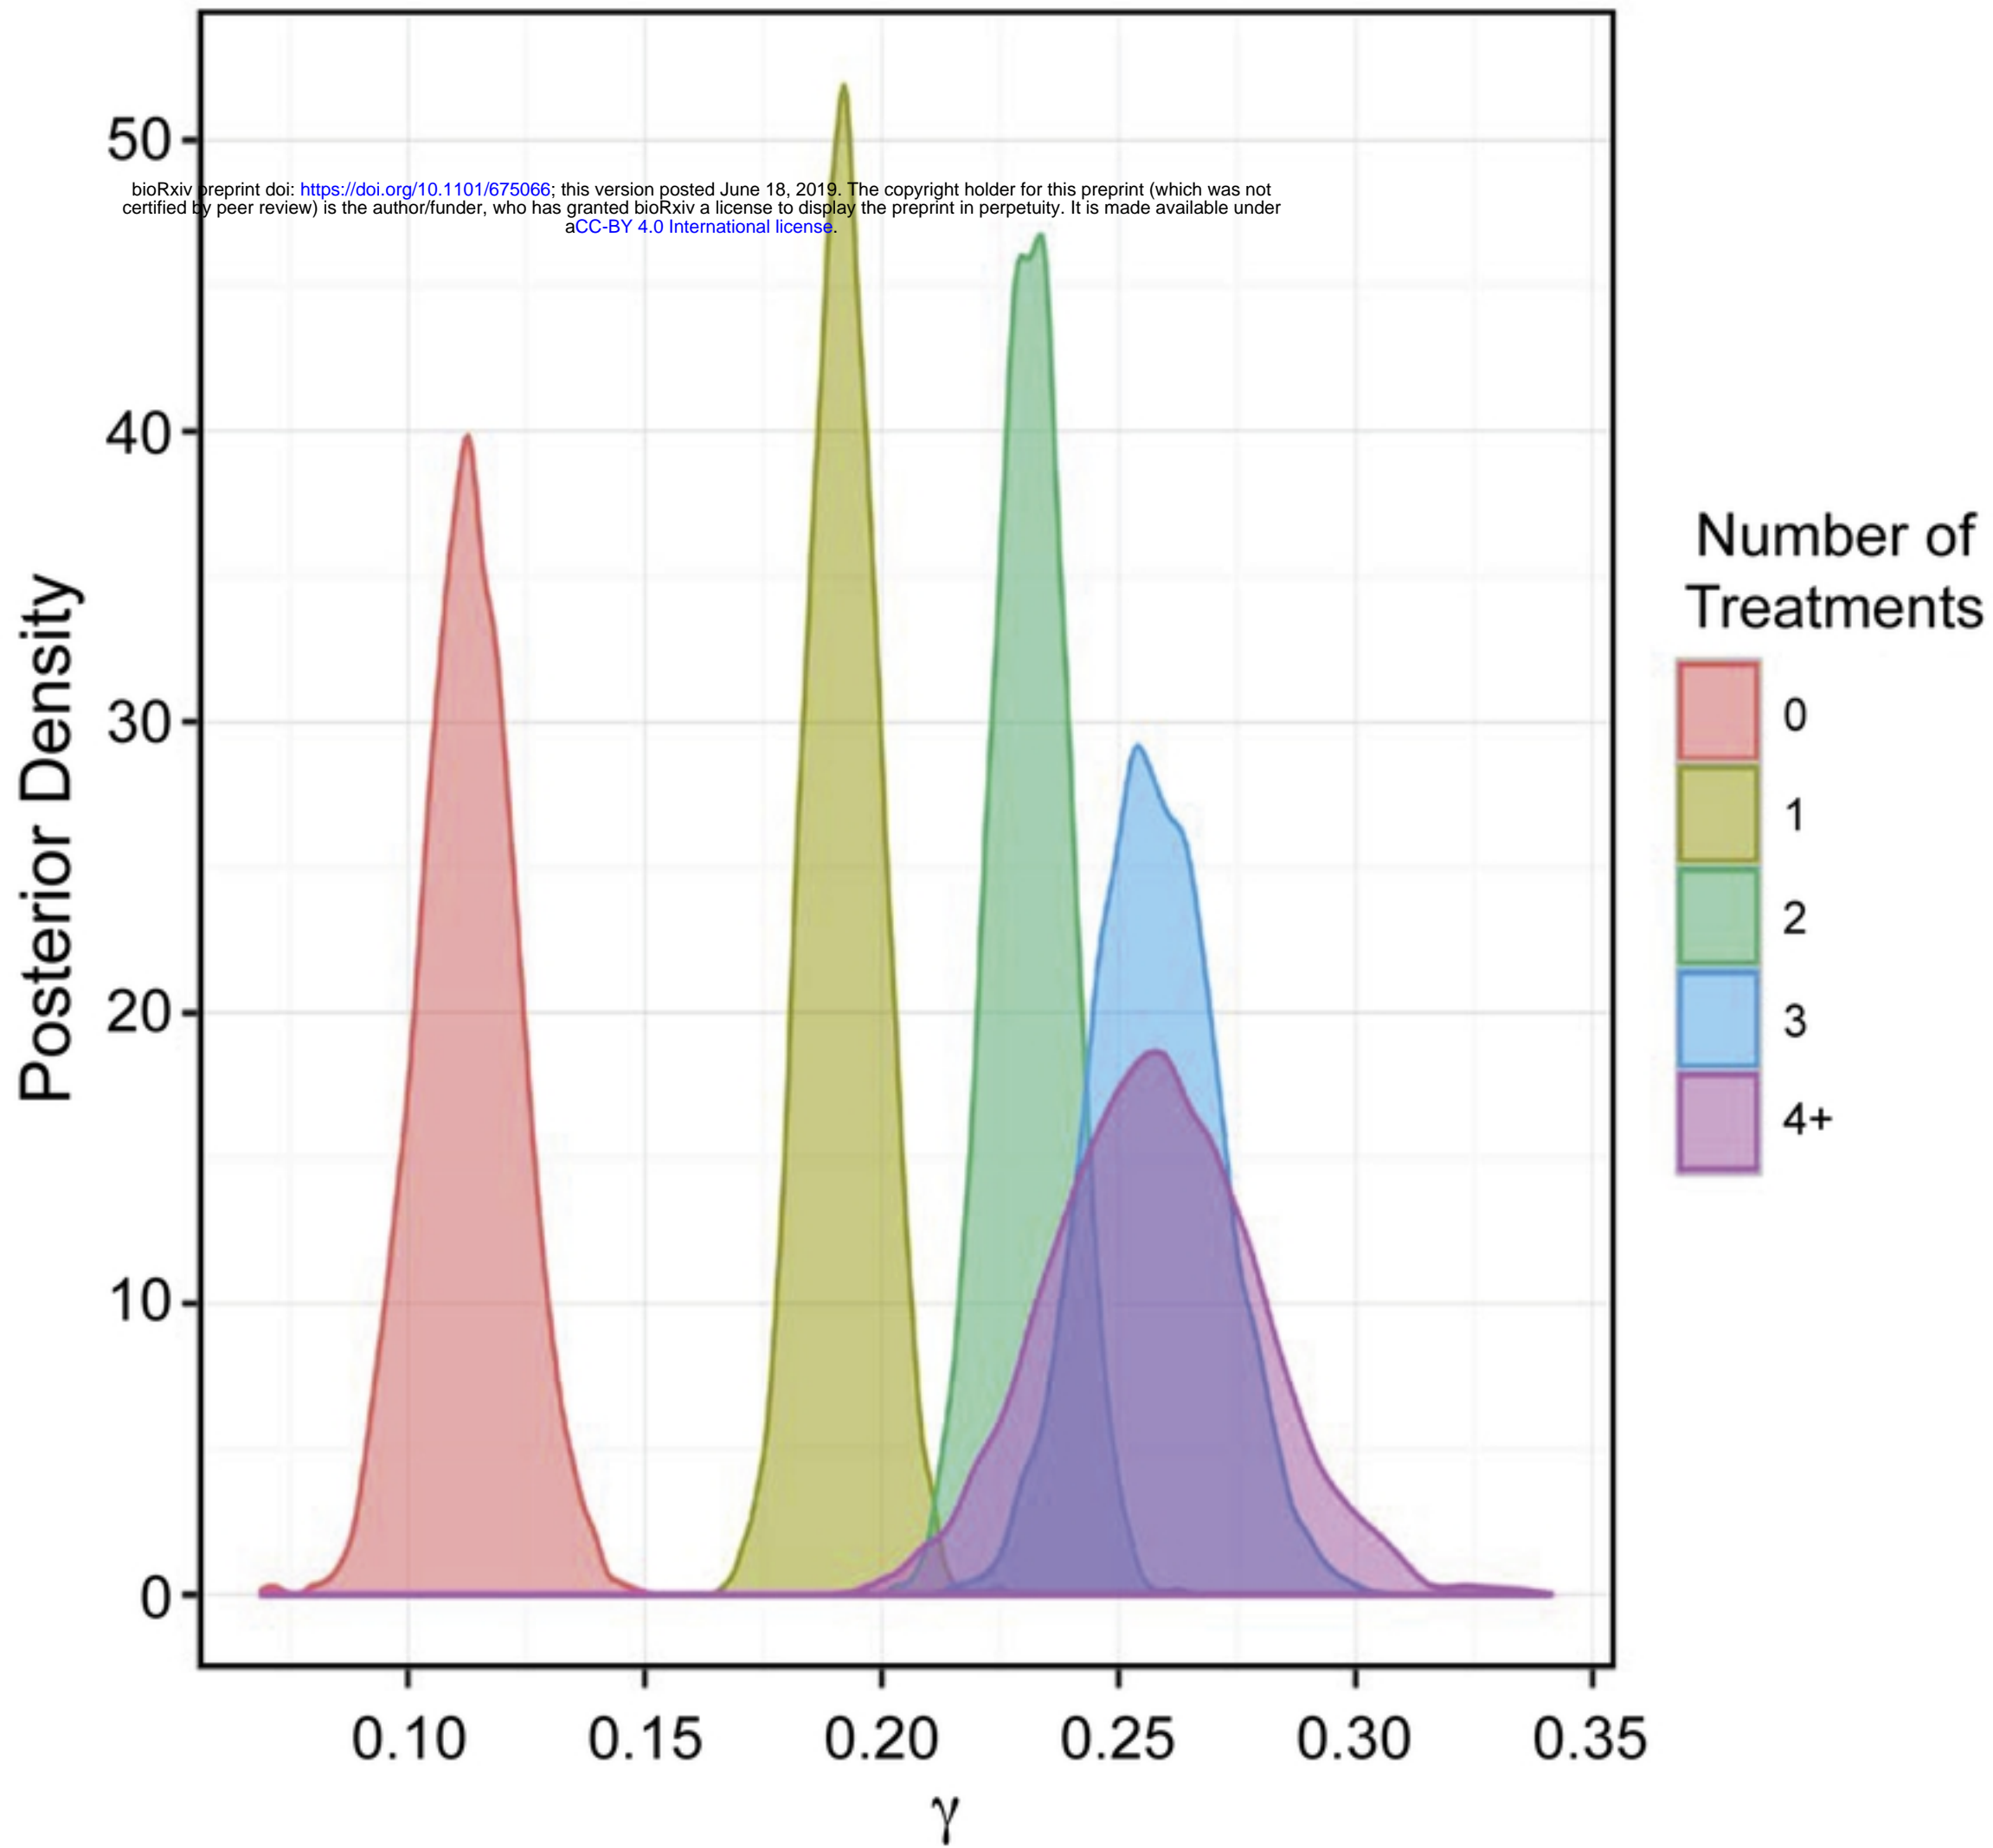

Figure 5

bioRxiv preprint doi: <https://doi.org/10.1101/675066>; this version posted June 18, 2019. The copyright holder for this preprint (which was not certified by peer review) is the author/funder, who has granted bioRxiv a license to display the preprint in perpetuity. It is made available under aCC-BY 4.0 International license.

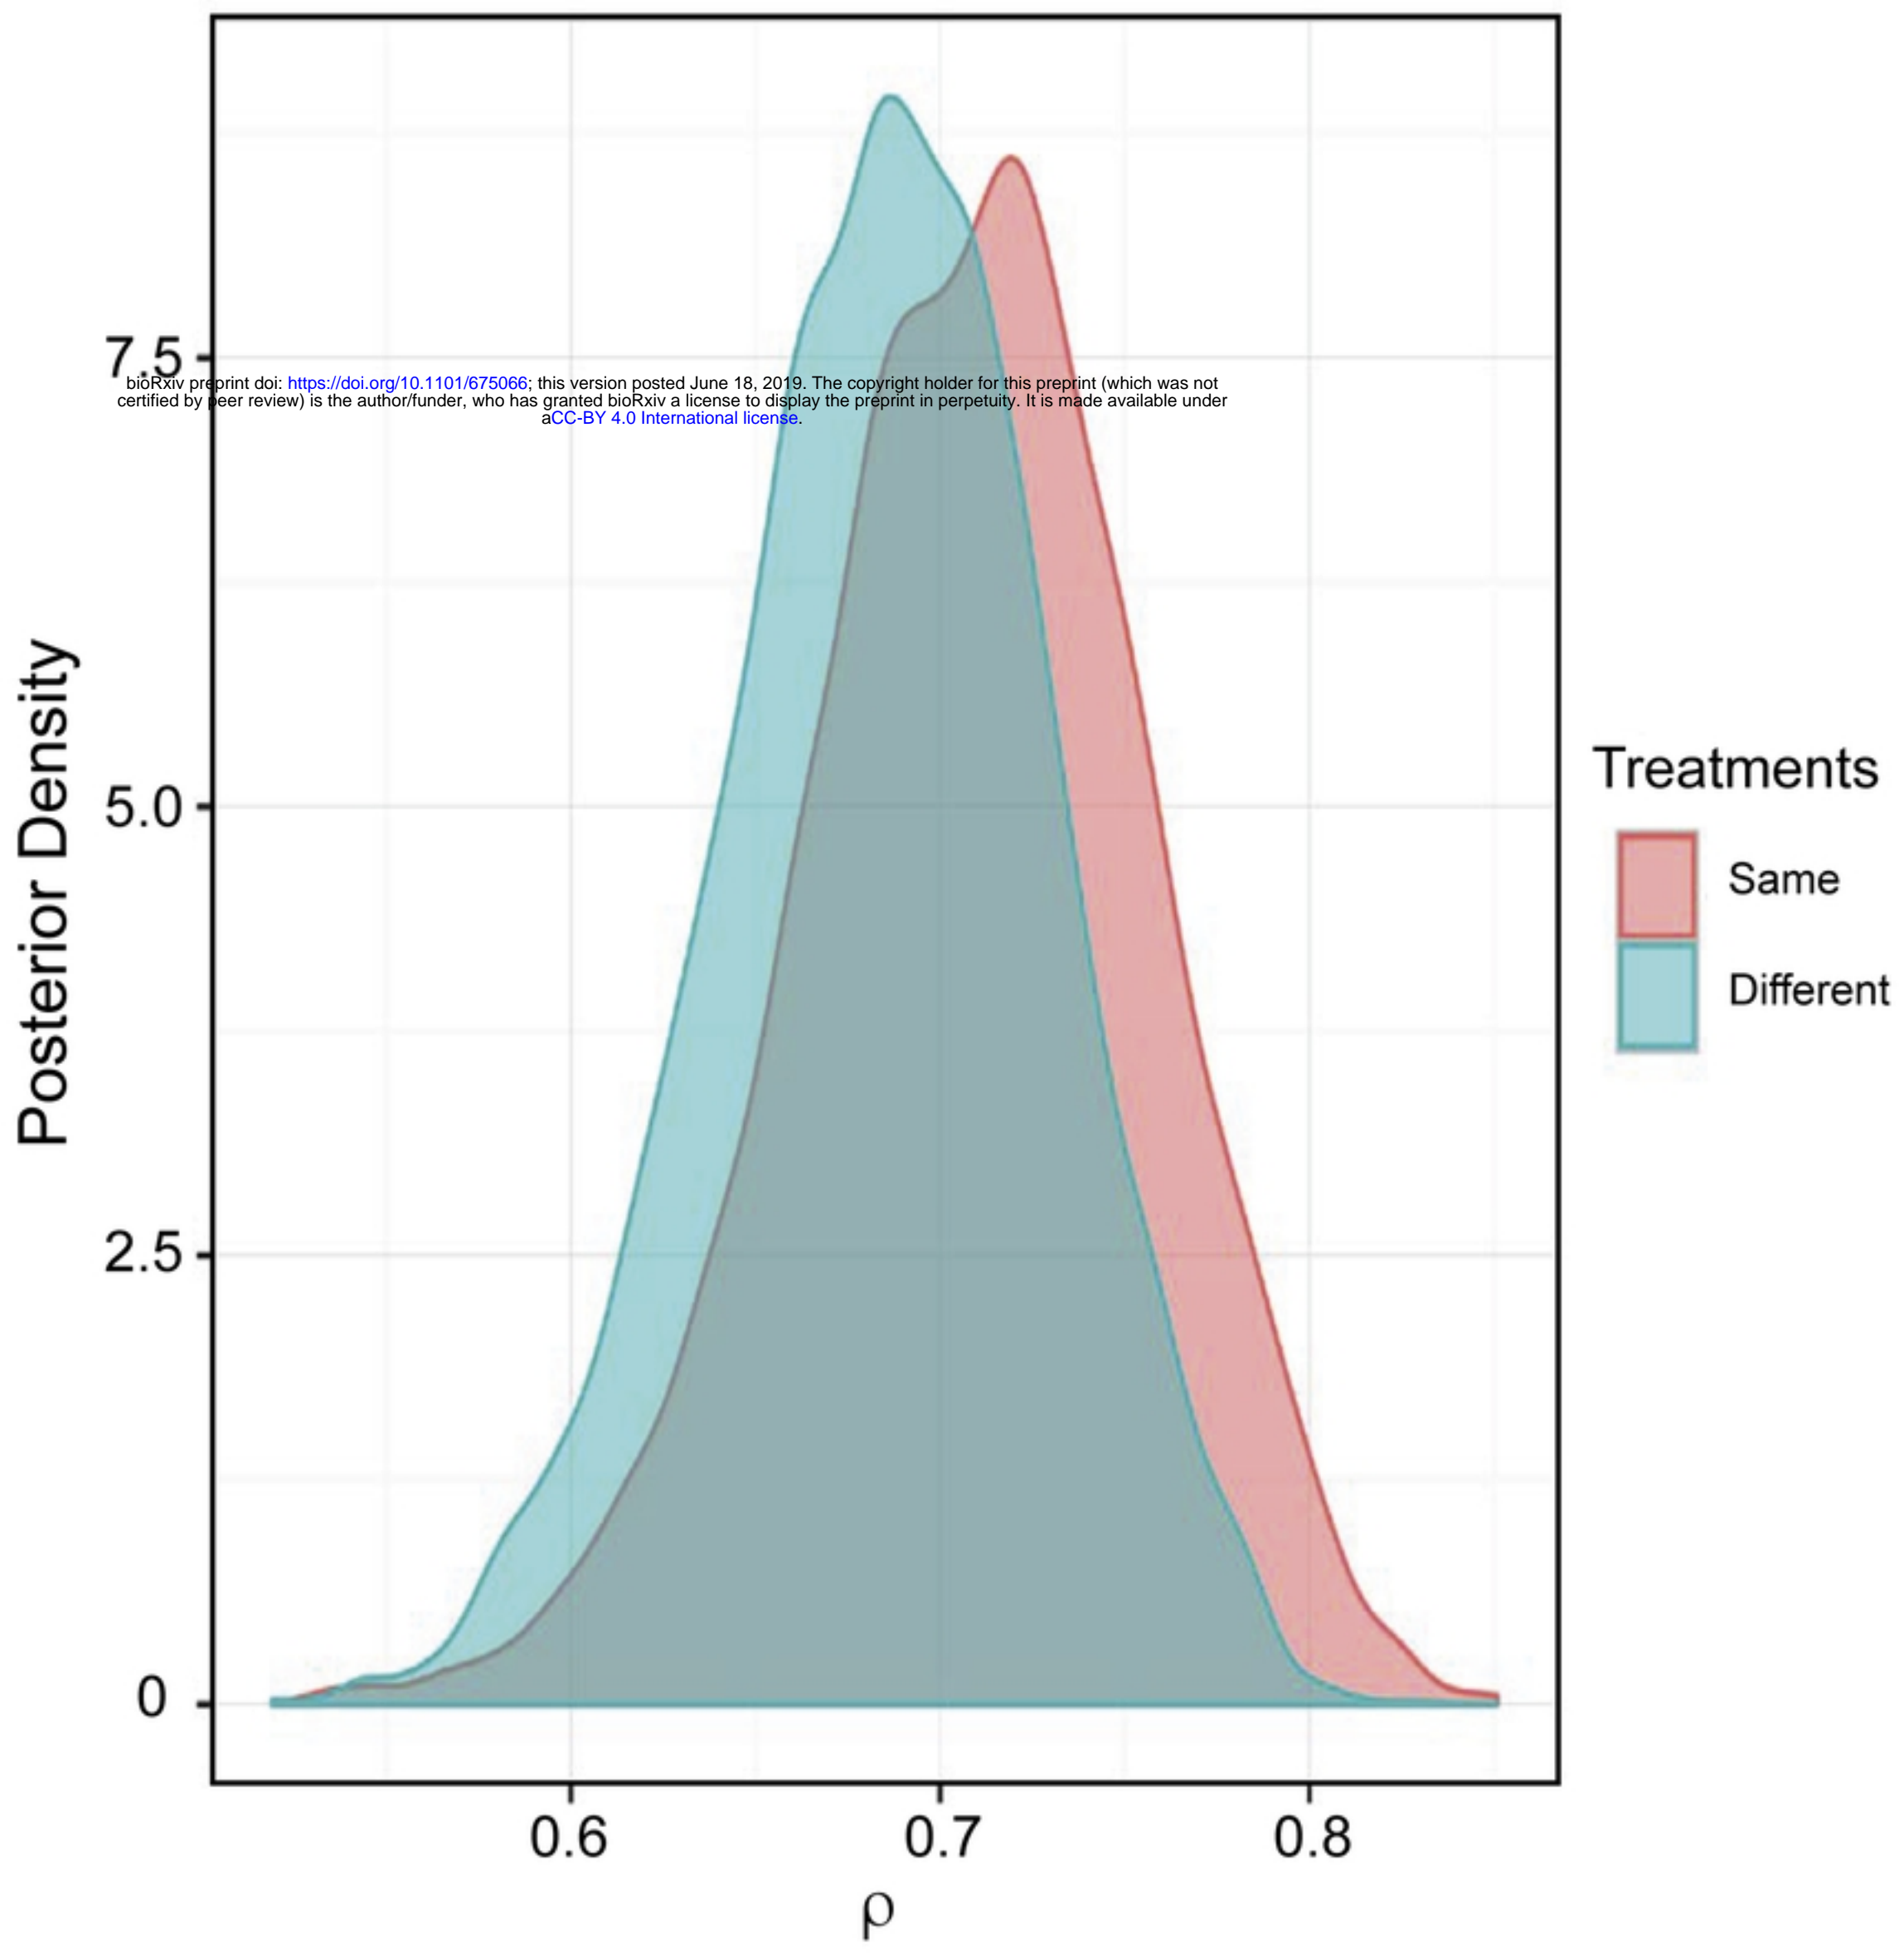

Figure 6

bioRxiv preprint doi: <https://doi.org/10.1101/675066>; this version posted June 18, 2019. The copyright holder for this preprint (which was not certified by peer review) is the author/funder, who has granted bioRxiv a license to display the preprint in perpetuity. It is made available under aCC-BY 4.0 International license.

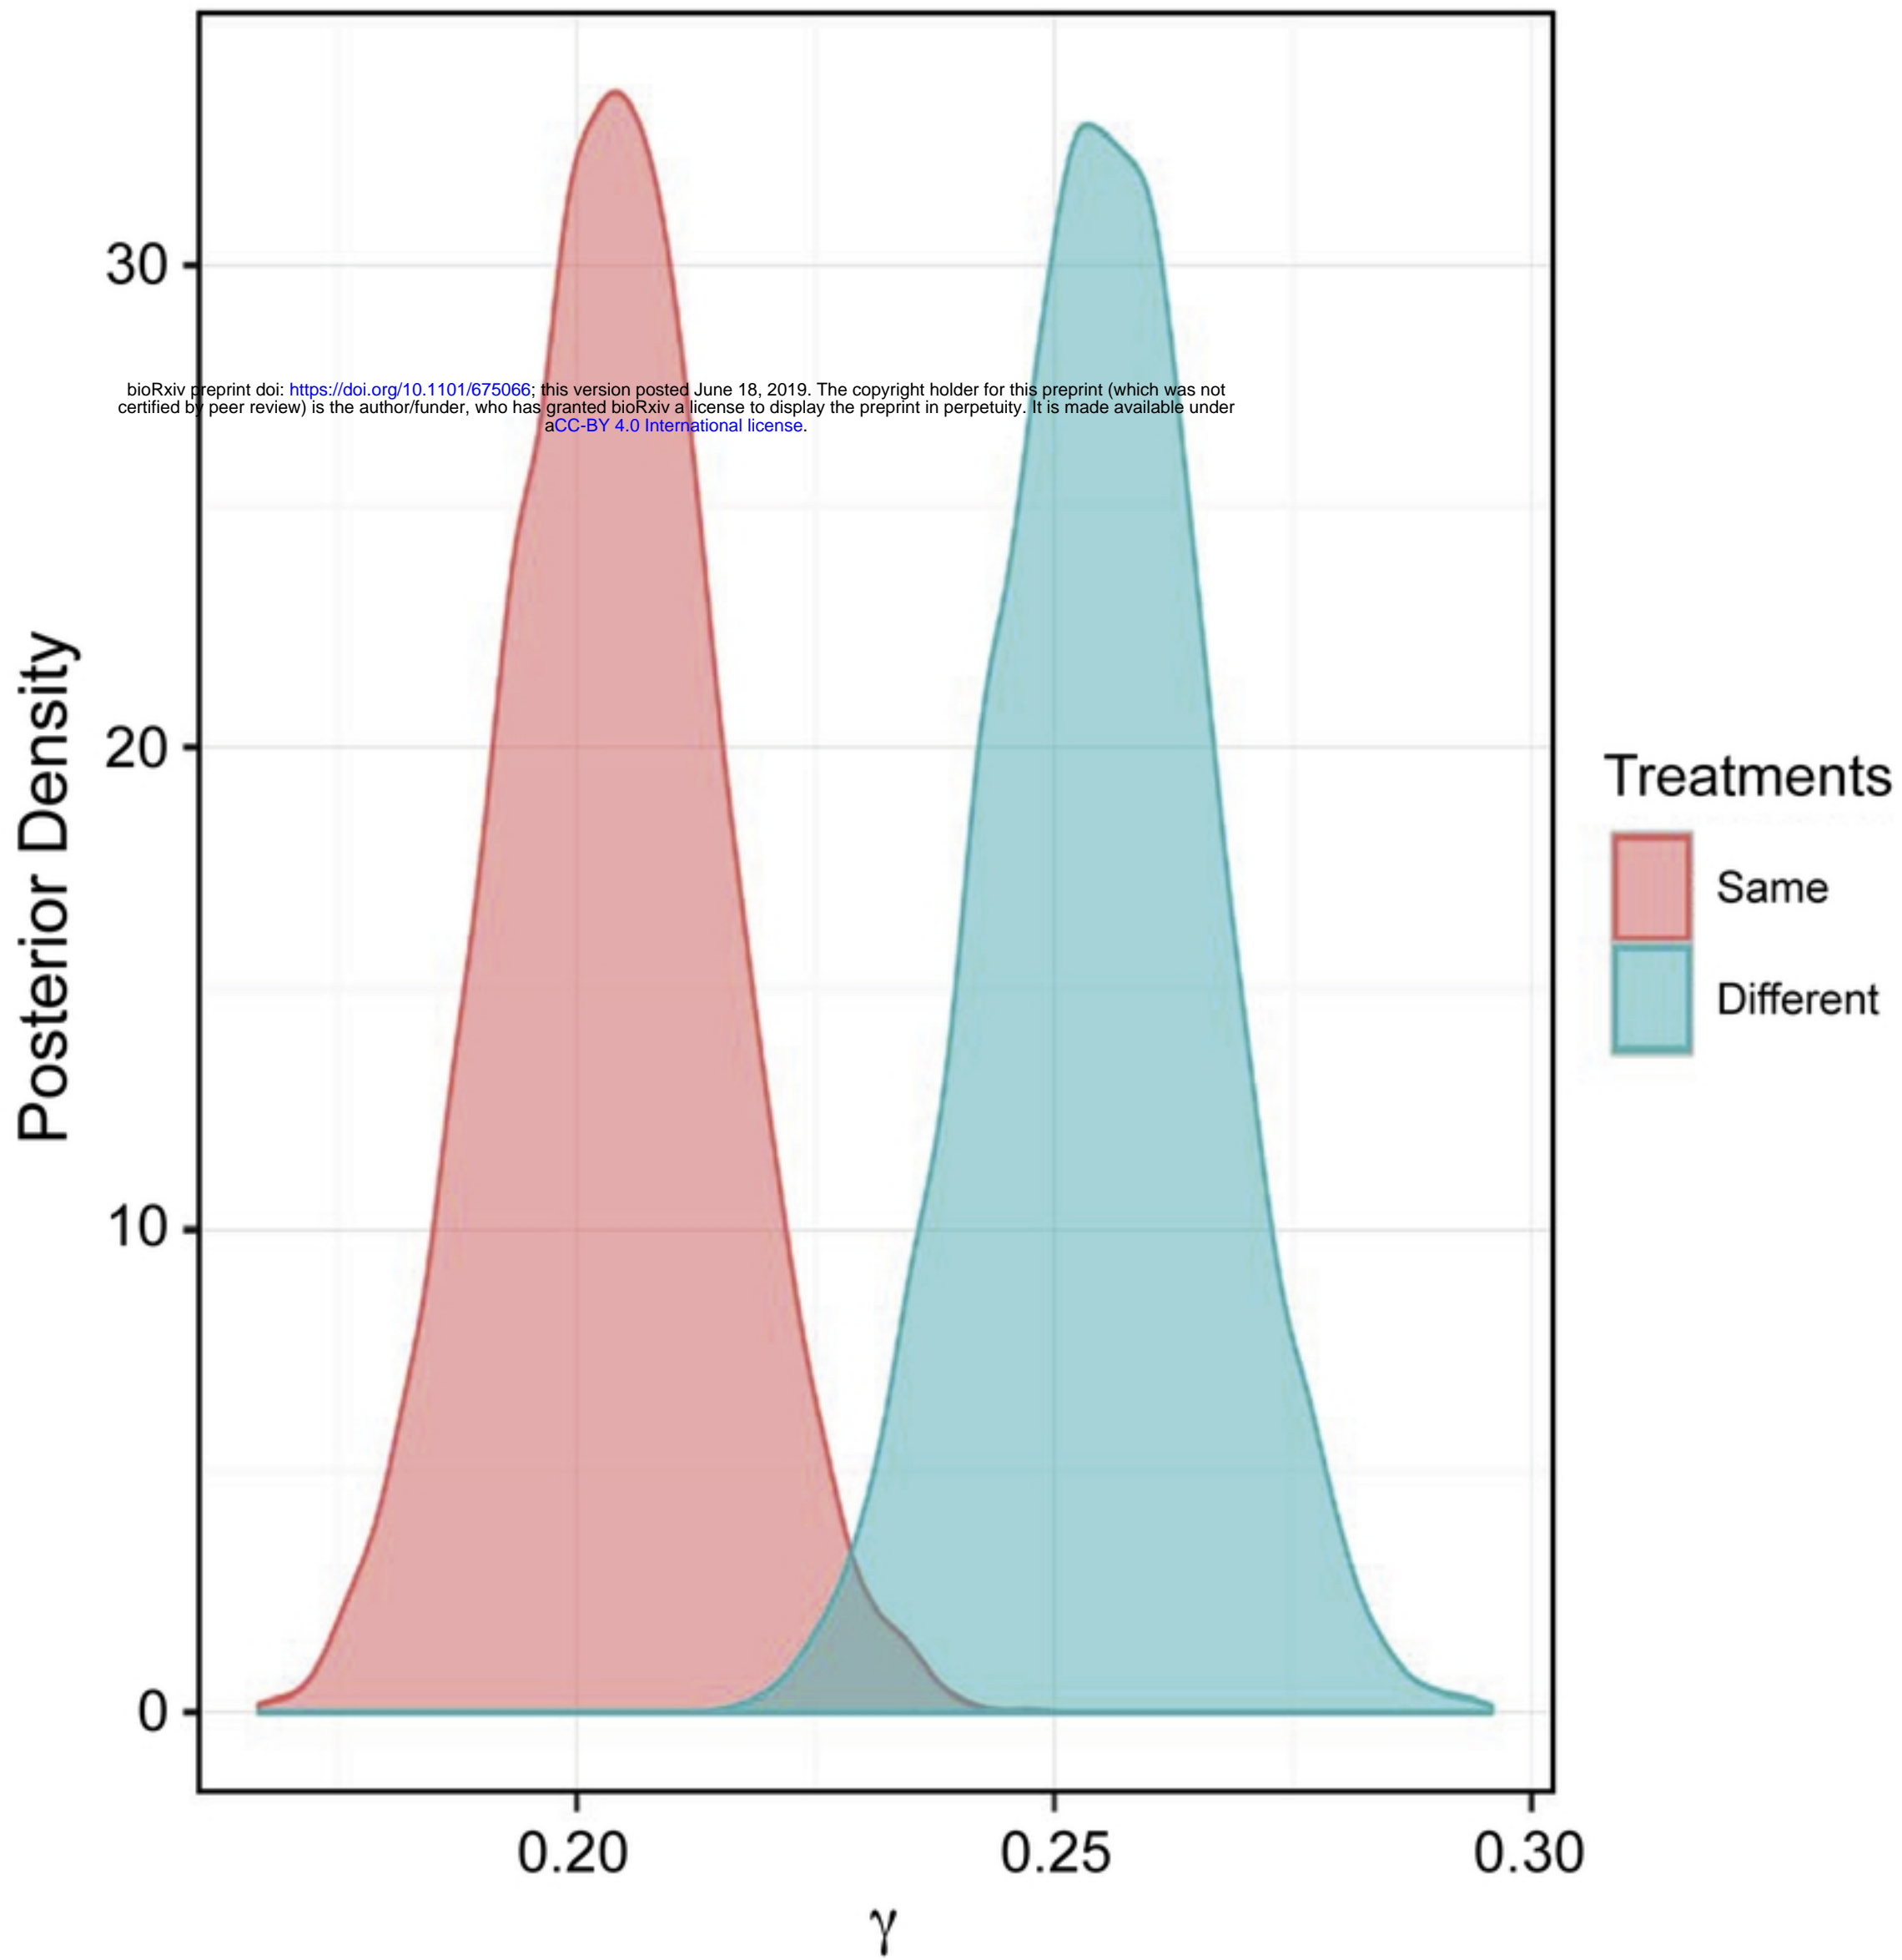

Figure 7

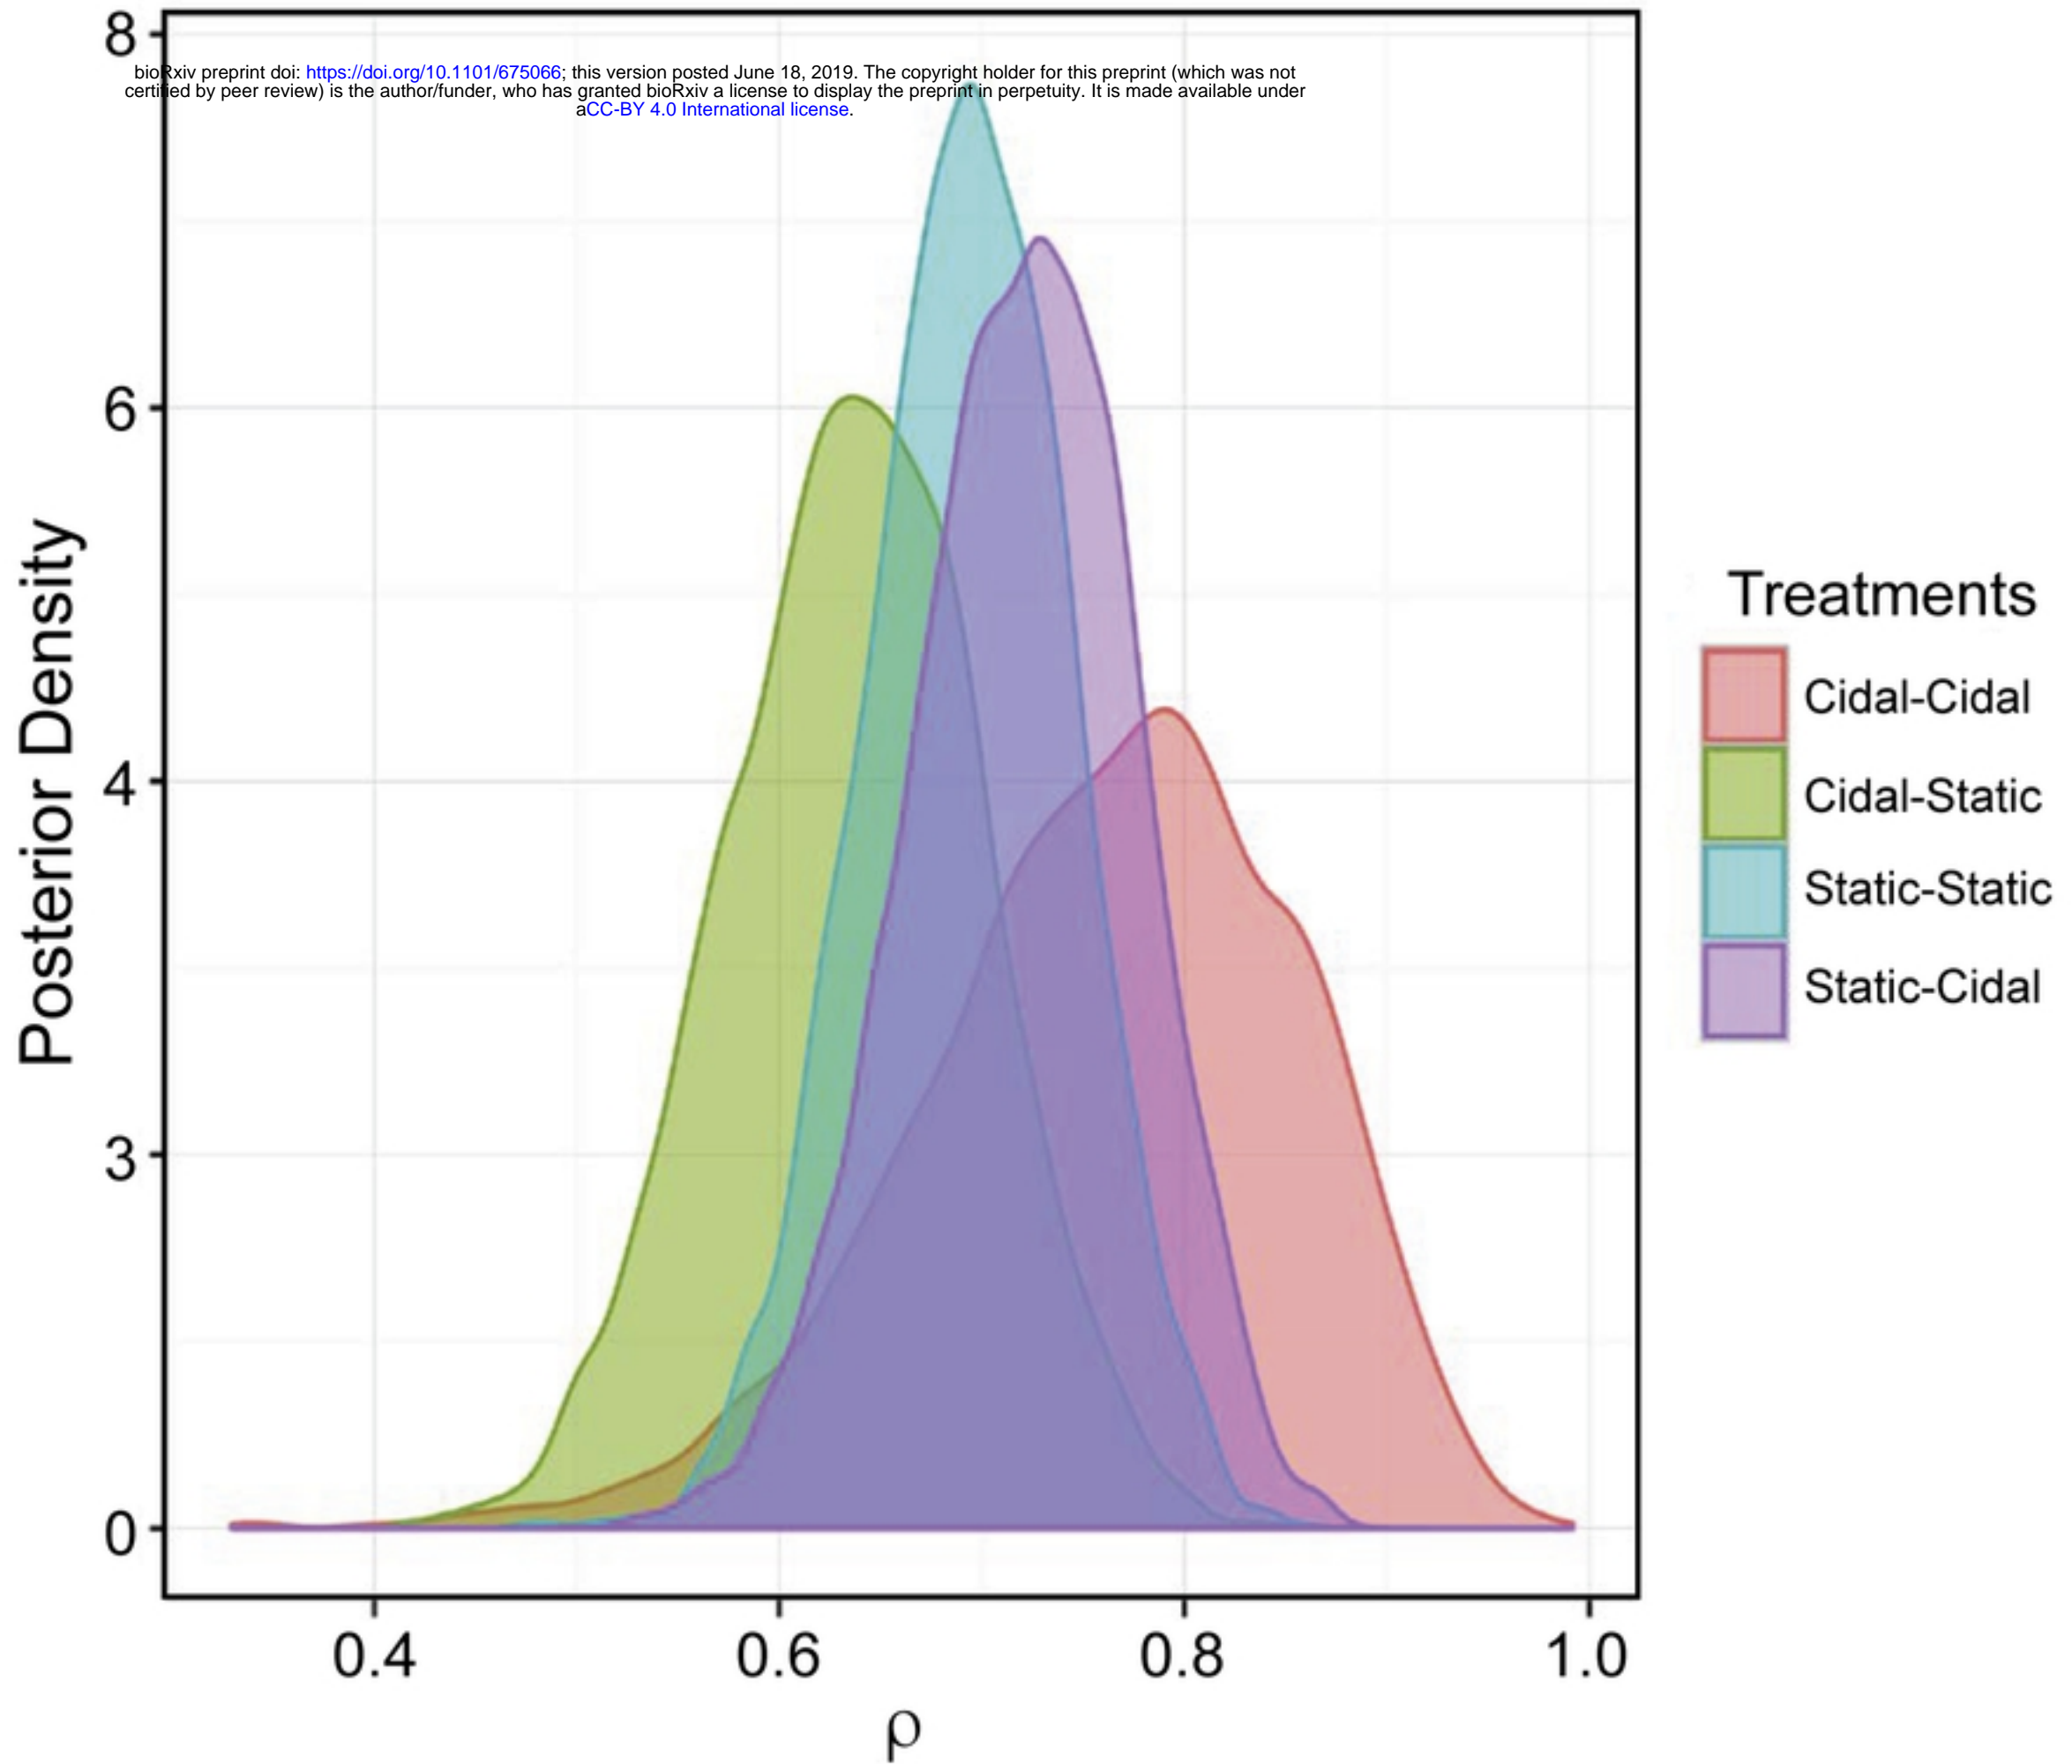

Figure 8

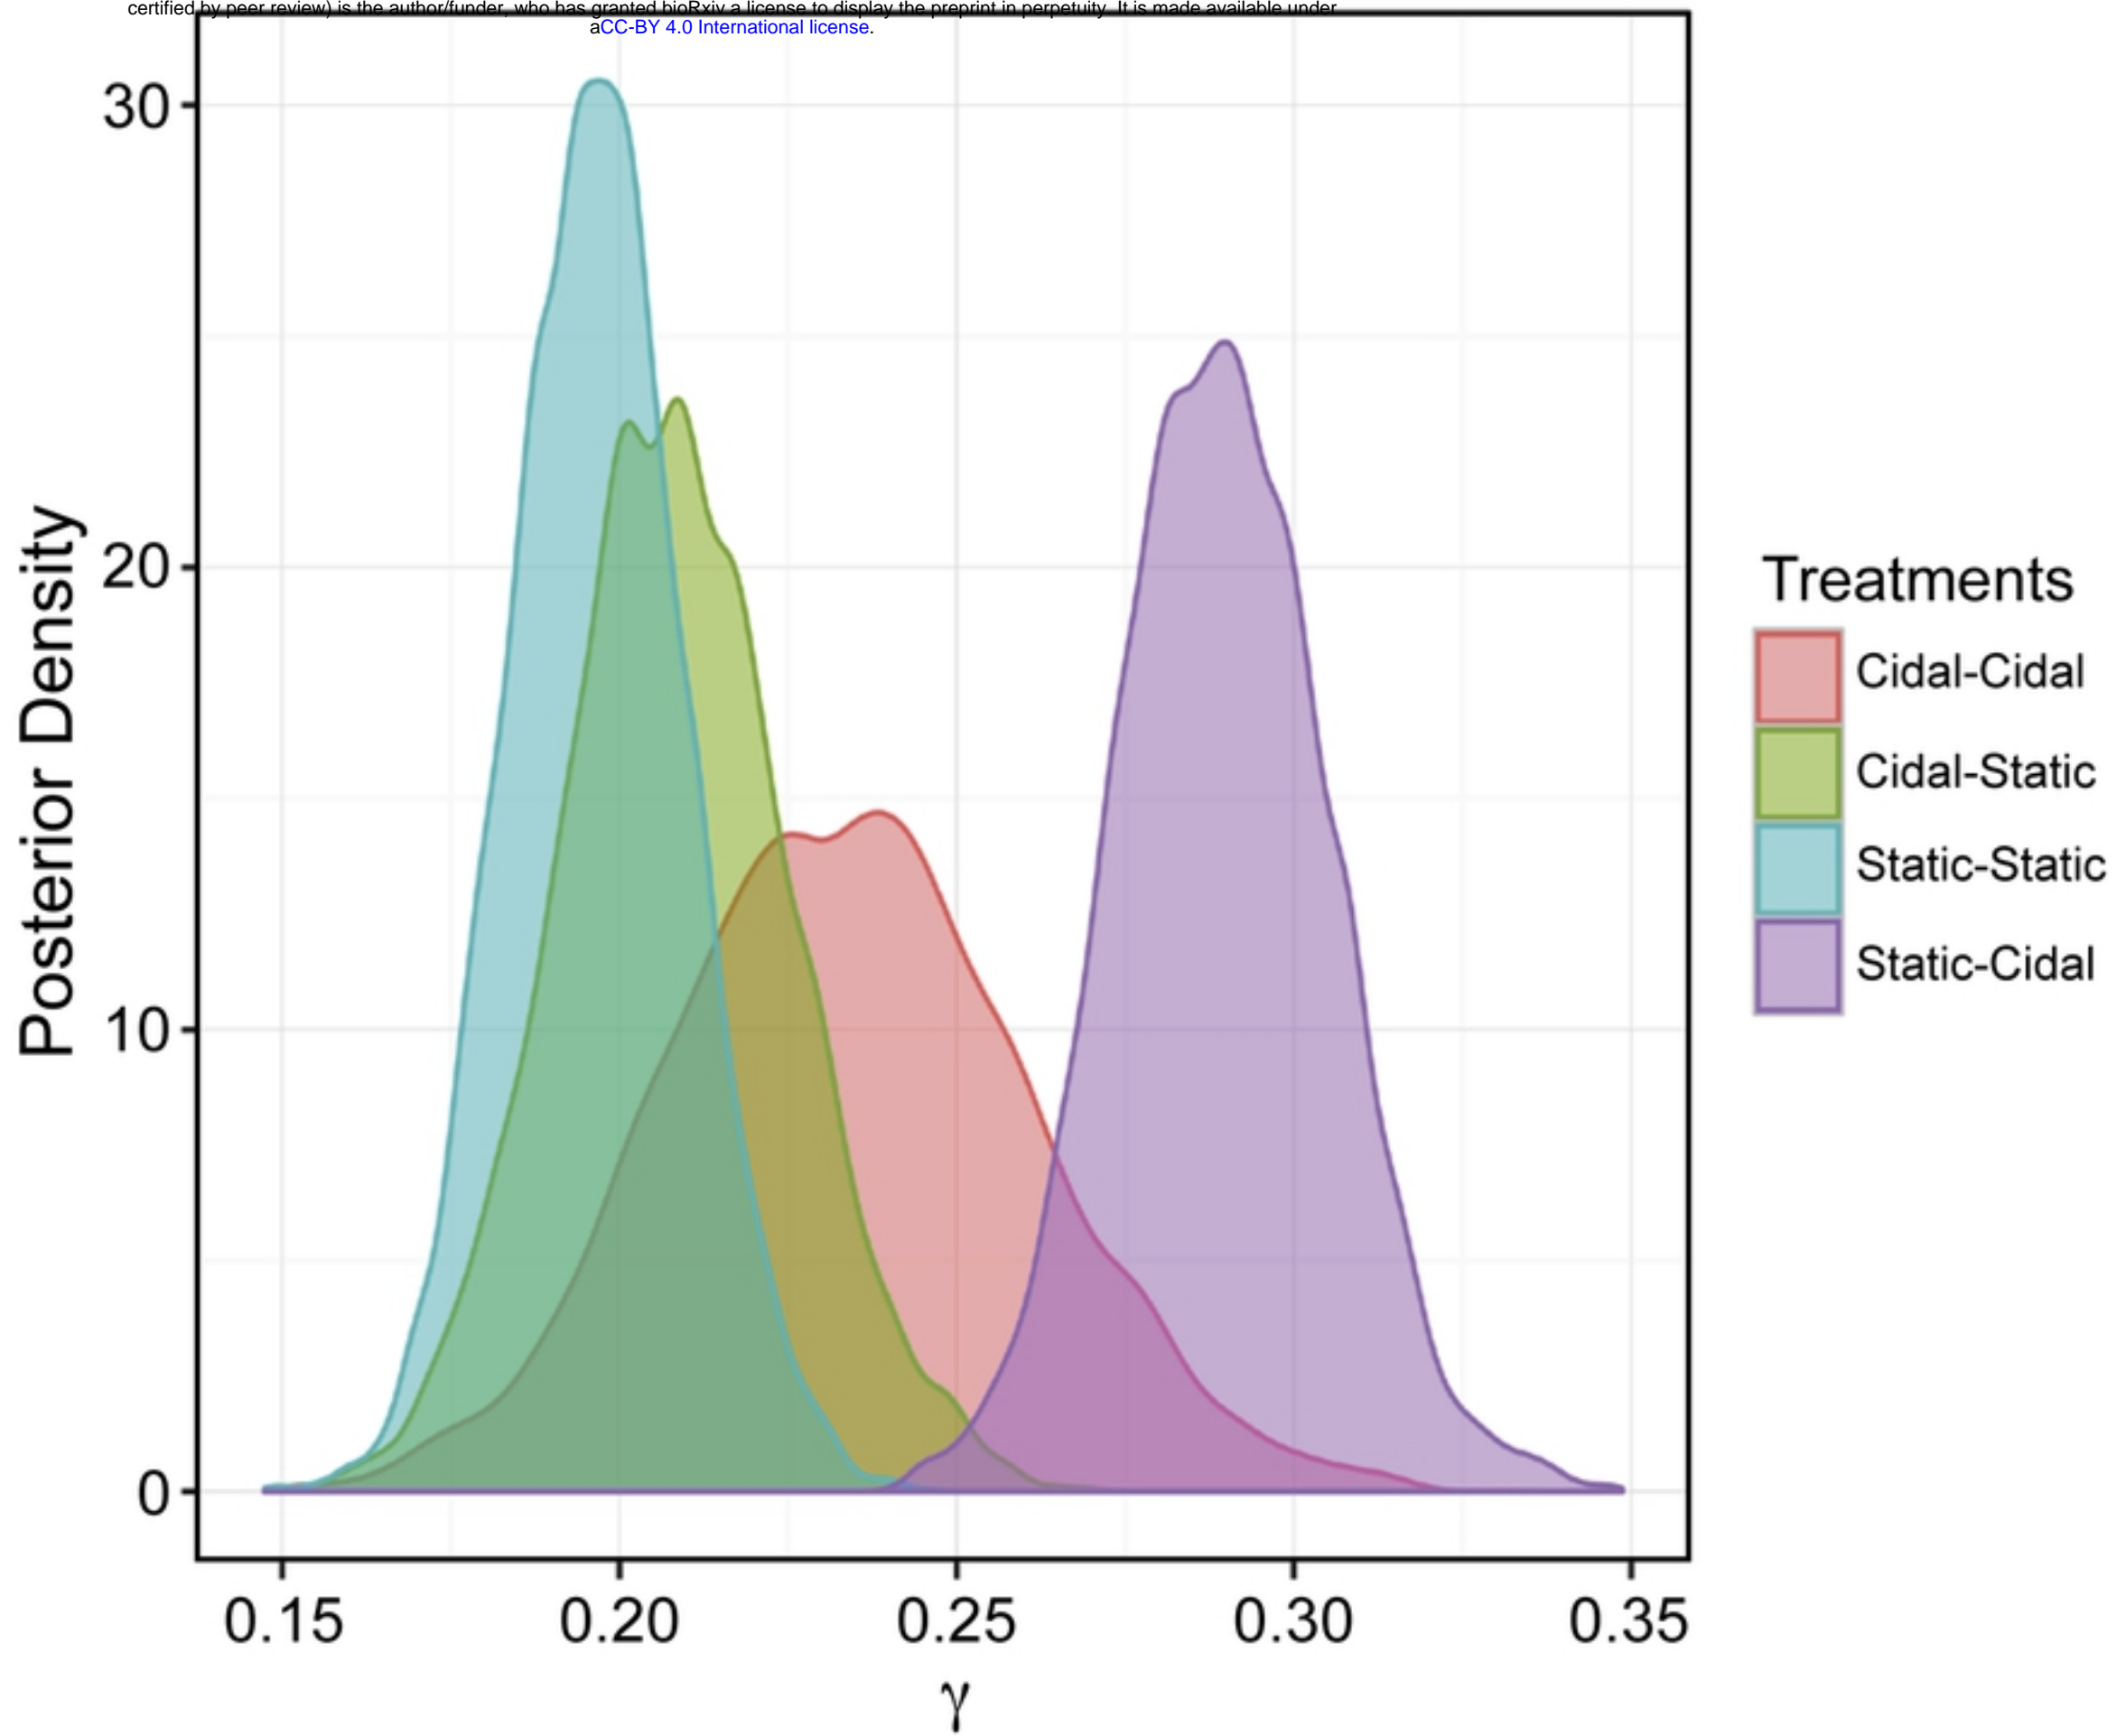

Figure 9
